# Supplementary material for: Solution structural characterization of an array of nanoscale aqueous inorganic Ga13−xInx (0 ≤ x ≤ 6) clusters by 1H-NMR and QM computations
Source: Royal Society of Chemistry journal article supplement (doi:10.1039/c5sc00776c), 2015-01-01
Supplement: c5sc00776c1.pdf [file c5sc00776c1.pdf]

## Solution-Phase Structural Characterization of an Array of Inorganic $\text{Ga}_{13-x}\text{In}_x$ ( $0 \leq x \leq 6$ ) Nanoscale Clusters by $^1\text{H-NMR}$ and QMC.

Anna F. Oliveri,<sup>†</sup> Lindsay A. Wills,<sup>‡</sup> Caitlyn R. Hazlett,<sup>†</sup> Matthew E. Carnes,<sup>†</sup> I-Ya Chang,<sup>‡</sup>  
Paul Ha-Yeon Cheong,<sup>\*,‡</sup> Darren W. Johnson<sup>\*,†</sup>

<sup>†</sup> Department of Chemistry & Biochemistry and Materials Science Institute, University of Oregon, Eugene, Oregon  
97403-1253, United States

<sup>‡</sup> Department of Chemistry, Oregon State University, 153 Gilbert Hall, Corvallis, Oregon 97331-4003, United States  
[dwj@uoregon.edu](mailto:dwj@uoregon.edu); [paulc@science.oregonstate.edu](mailto:paulc@science.oregonstate.edu)

### Contents:

|                                                          |    |
|----------------------------------------------------------|----|
| Representative DOSY of $\text{Ga}_7\text{In}_6$ .....    | S2 |
| Representative DOSY of $\text{Ga}_8\text{In}_5$ .....    | S2 |
| Representative DOSY of $\text{Ga}_9\text{In}_4$ .....    | S3 |
| Representative DOSY of $\text{Ga}_{10}\text{In}_3$ ..... | S3 |
| Representative DOSY of $\text{Ga}_{11}\text{In}_2$ ..... | S4 |
| Representative DOSY of $\text{Ga}_{12}\text{In}_1$ ..... | S4 |
| Diffusion Data and Radii of Clusters.....                | S5 |
| Computed Spectra of Clusters without Counterions.....    | S6 |
| XYZ of Clusters.....                                     | S7 |

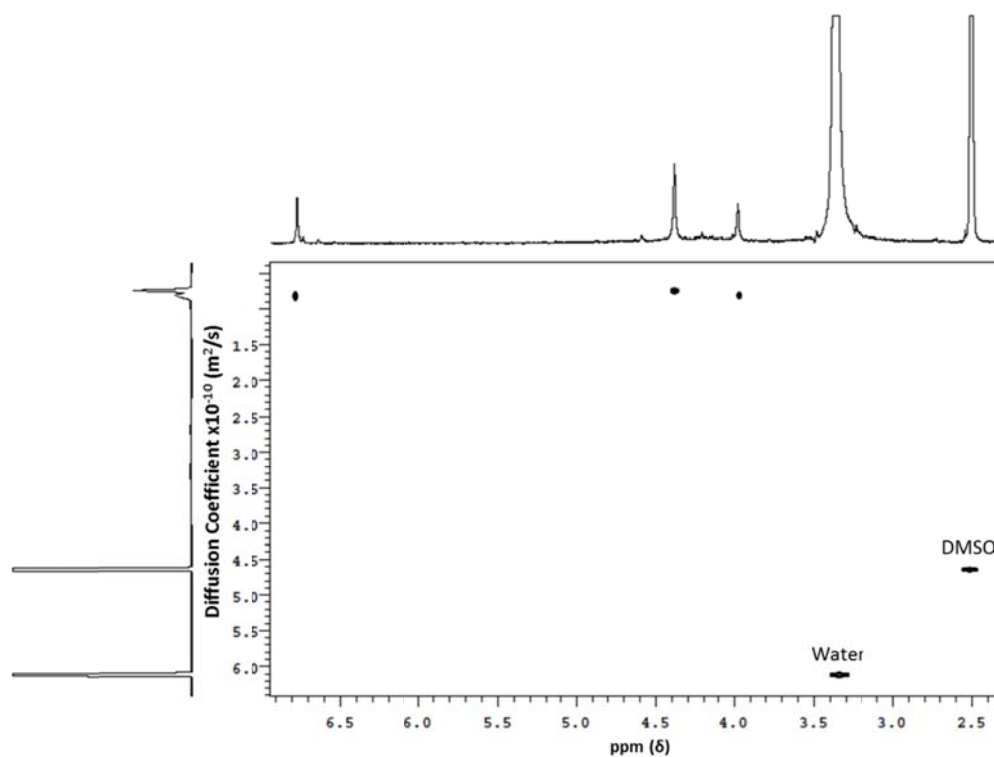

Figure S1: Representative DOSY of 2 mM  $\text{Ga}_7\text{In}_6$  in  $d_6$ -DMSO.

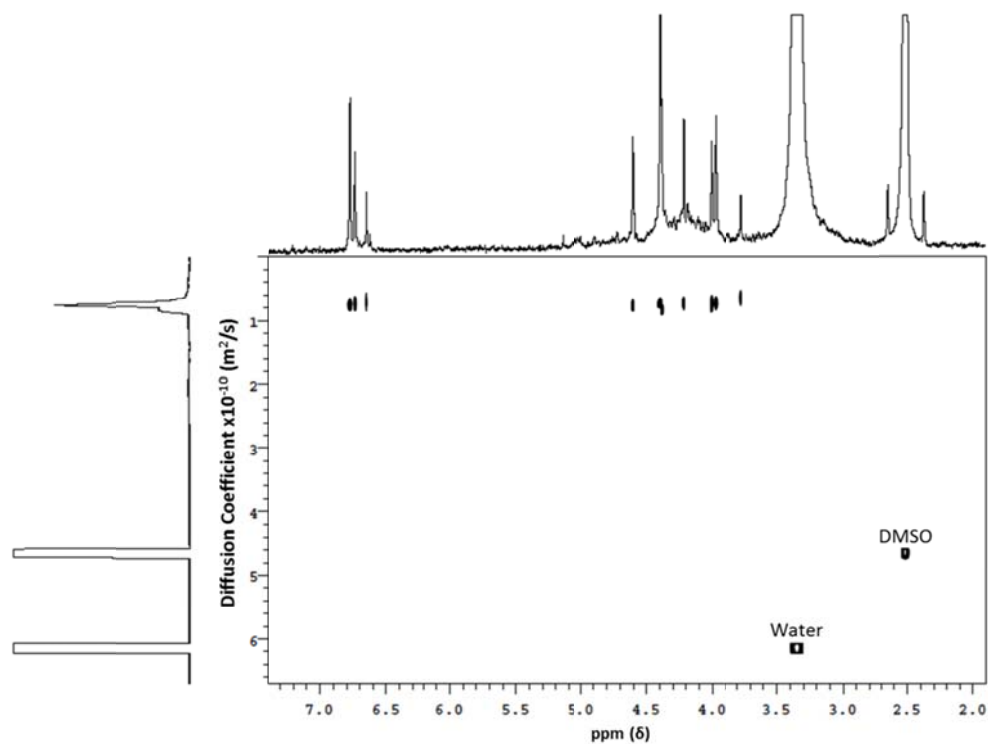

Figure S2: Representative DOSY of 2 mM  $\text{Ga}_8\text{In}_5$  in  $d_6$ -DMSO.

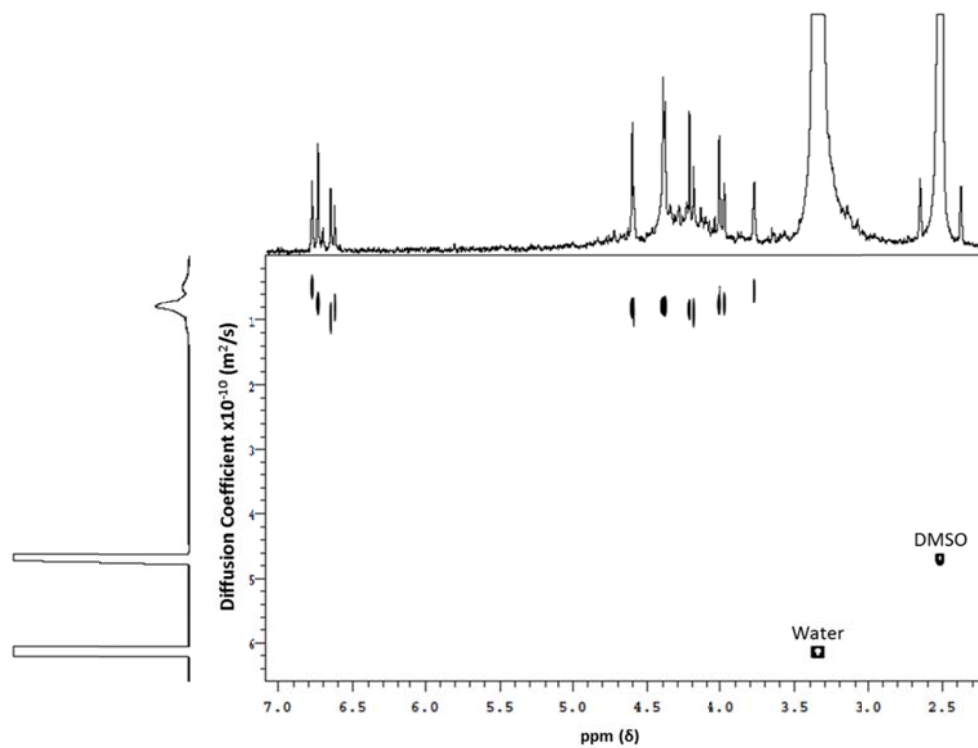

Figure S3: Representative DOSY of 2 mM  $\text{Ga}_9\text{In}_4$  in  $d_6$ -DMSO.

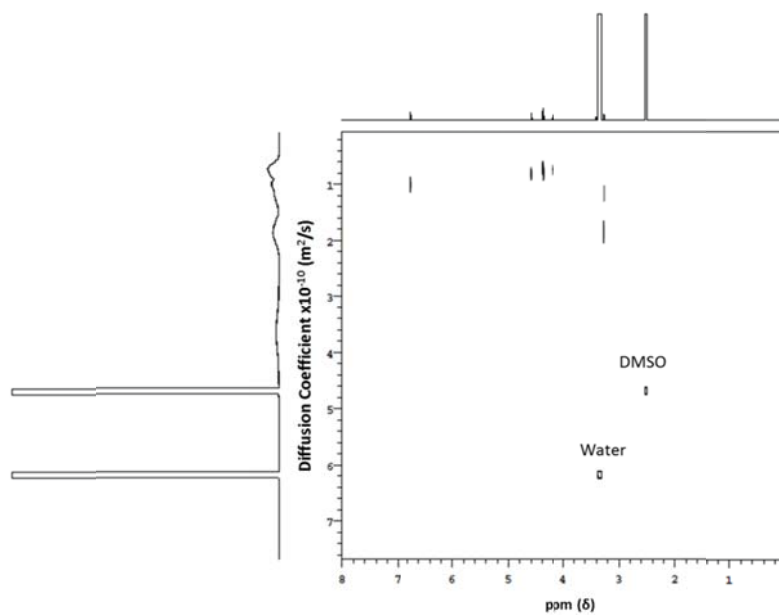

Figure S4: Representative DOSY of 2 mM  $\text{Ga}_{10}\text{In}_3$  in  $d_6$ -DMSO.

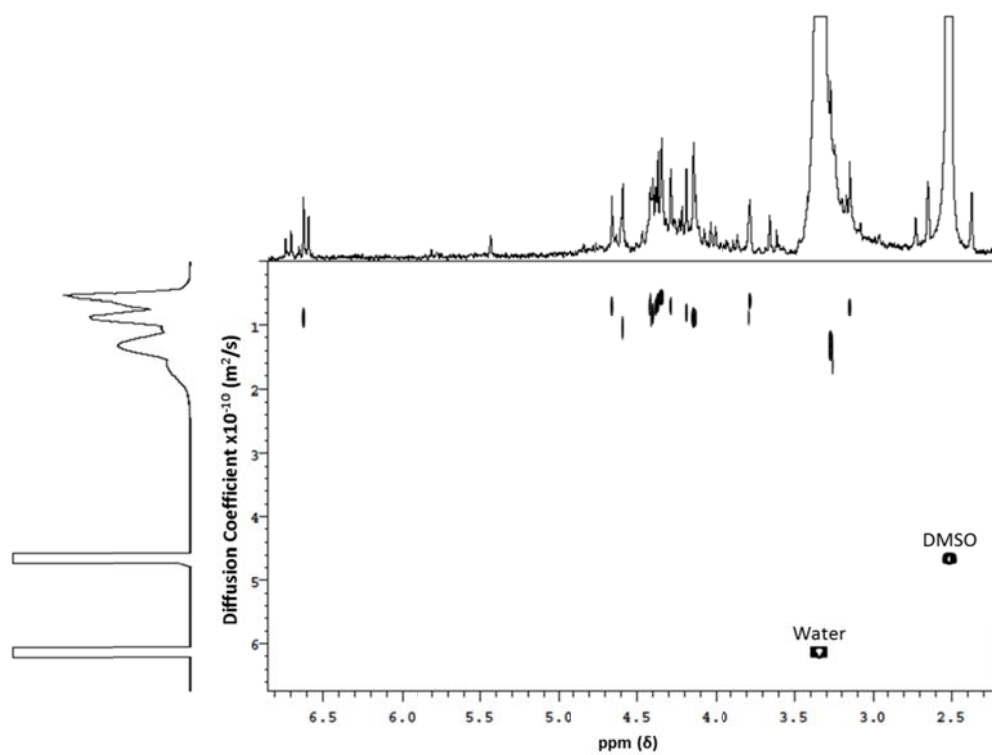

Figure S5: Representative DOSY of 2 mM Ga<sub>11</sub>In<sub>2</sub> in *d*<sub>6</sub>-DMSO.

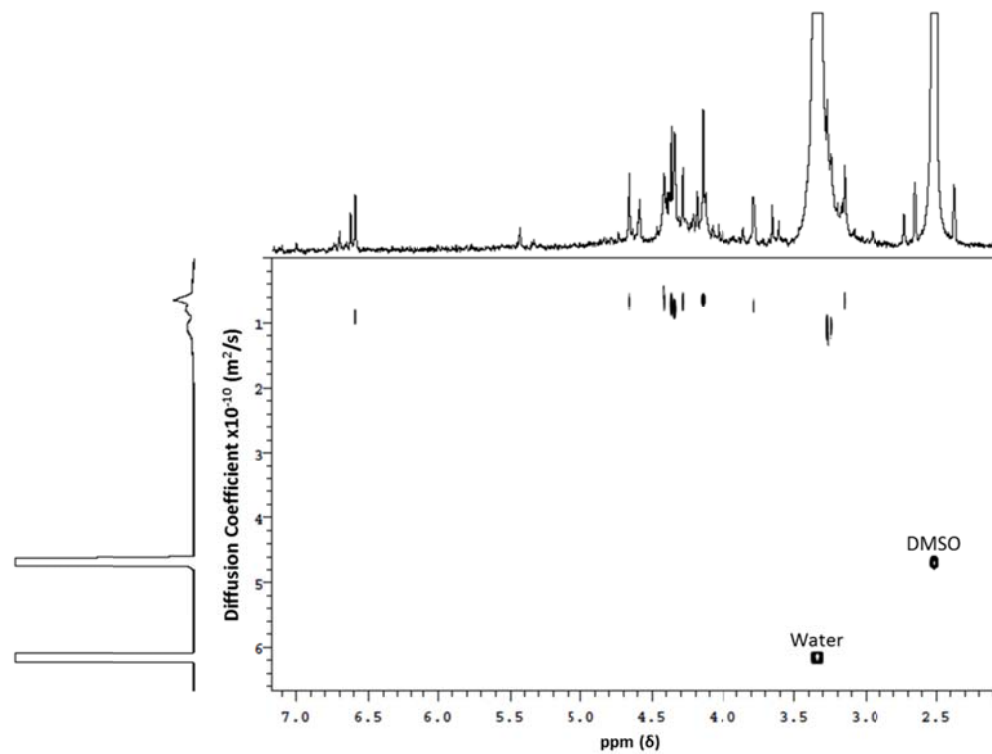

Figure S6: Representative DOSY of 2 mM Ga<sub>12</sub>In<sub>1</sub> in *d*<sub>6</sub>-DMSO.

**Table S1:** Diffusion Data and Radii of Ga<sub>13-x</sub>In<sub>x</sub> Clusters. T = 298 K;  $\eta = 2.03 \times 10^{-3}$  Pa·s; Concentration = 2 mM; Solvent *d*<sub>6</sub>-DMSO; 500 MHz NMR

| Species                          | Average Diffusion Coefficient x 10 <sup>-10</sup> (m <sup>2</sup> /s) | Average Radius (Å) |
|----------------------------------|-----------------------------------------------------------------------|--------------------|
| Ga <sub>7</sub> In <sub>6</sub>  | 0.99 ± 0.12                                                           | 11.1 ± 1.1         |
| Ga <sub>8</sub> In <sub>5</sub>  | 1.16 ± 0.04                                                           | 9.4 ± 0.4          |
| Ga <sub>9</sub> In <sub>4</sub>  | 0.92 ± 0.11                                                           | 11.7 ± 1.5         |
| Ga <sub>10</sub> In <sub>3</sub> | 1.09 ± 0.17                                                           | 9.9 ± 1.6          |
| Ga <sub>11</sub> In <sub>2</sub> | 0.97 ± 0.13                                                           | 11.1 ± 1.4         |
| Ga <sub>12</sub> In <sub>1</sub> | 0.90 ± 0.14                                                           | 12.0 ± 1.9         |
| Ga <sub>13</sub>                 | 0.96 ± 0.06                                                           | 11.2 ± 0.8         |

Initially, the clusters of interest were optimized with full quantum mechanics, as described in the manuscript, as implemented in Gaussian03. The computed shifts were then scaled with constant scaling factors (F) for each type of proton and plotted against the experimental results. These results look uncannily good, with nearly all peaks accounted for. However, these predictions switch the ordering of the internal and external  $\mu_2$ -OH protons.

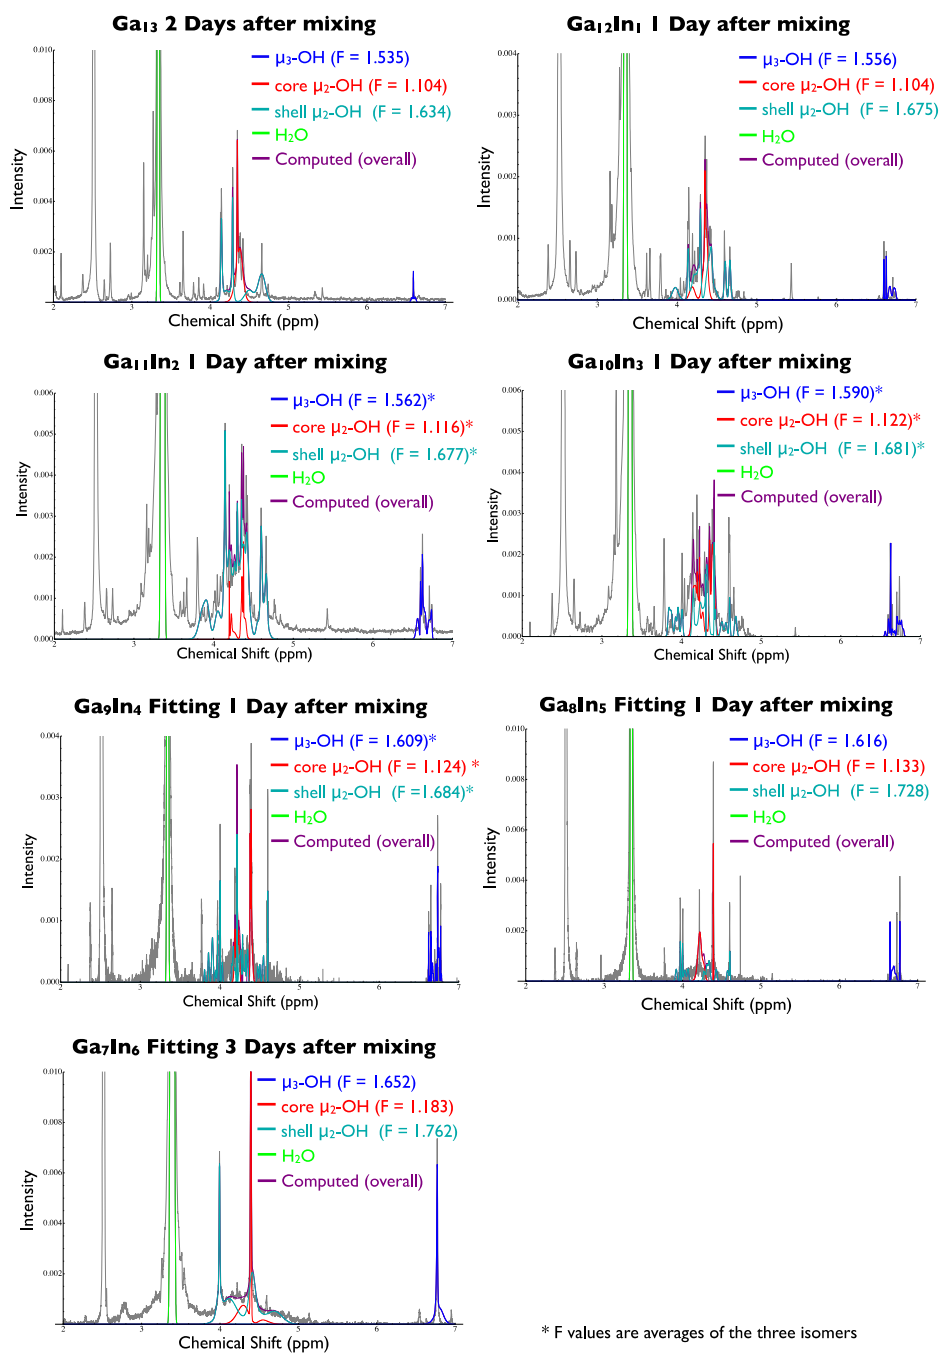

Figure S7: Experimental vs. computed spectra for quantum mechanically optimized cluster structures without counterions.

XYZ of Ga<sub>7</sub>In<sub>6</sub>

193

|    |           |           |           |
|----|-----------|-----------|-----------|
| In | 4.916147  | 1.984595  | -1.232080 |
| In | -5.565192 | -2.143545 | 0.821920  |
| In | -4.355745 | 3.298356  | -2.468080 |
| In | 3.705700  | -3.457305 | 2.056920  |
| In | -0.835464 | -5.457933 | -2.100080 |
| In | 0.185419  | 5.298983  | 1.689920  |
| Ga | -0.325023 | -0.078975 | -0.205080 |
| Ga | 2.752941  | -0.523227 | 0.135920  |
| Ga | -3.403986 | 0.365278  | -0.546080 |
| Ga | -1.472784 | 2.825119  | -0.393080 |
| Ga | 0.821739  | -2.983069 | -0.016080 |
| Ga | -2.228224 | -2.536819 | -0.561080 |
| Ga | 1.578179  | 2.377869  | 0.150920  |
| O  | 4.164989  | 0.066657  | -1.007080 |
| O  | -4.815035 | -0.224606 | 0.596920  |
| O  | -2.406718 | 3.634196  | -1.850080 |
| O  | 1.755673  | -3.792145 | 1.439920  |
| O  | -2.173335 | -3.887823 | -1.911080 |
| O  | 1.523290  | 3.727874  | 1.500920  |
| O  | 3.098222  | 2.903744  | -0.870080 |
| O  | -3.748267 | -3.062694 | 0.459920  |
| O  | -4.358908 | 1.311356  | -1.896080 |
| O  | 3.707863  | -1.469306 | 1.486920  |
| O  | 0.747622  | -4.411063 | -1.277080 |
| O  | -1.398667 | 4.252113  | 0.867920  |
| O  | 6.855085  | 1.226436  | -1.763080 |
| O  | -7.506130 | -1.384386 | 1.351920  |
| O  | 3.863536  | -5.454318 | 2.836920  |
| O  | 1.656518  | 6.508863  | 2.685920  |
| O  | 5.730309  | 3.962528  | -1.455080 |
| O  | -6.381354 | -4.121478 | 1.045920  |
| O  | 5.736726  | -3.149472 | 2.693920  |
| O  | -1.173445 | 6.956095  | 1.884920  |
| O  | 1.373028  | 0.542886  | -0.958080 |
| O  | -2.022074 | -0.702835 | 0.547920  |
| O  | -1.502934 | 0.996122  | -1.341080 |
| O  | 0.853889  | -1.155071 | 0.930920  |
| O  | -0.450159 | -1.741964 | -1.233080 |
| O  | -0.199886 | 1.584015  | 0.821920  |
| O  | 2.652076  | 1.125781  | 1.103920  |
| O  | -3.302121 | -1.284730 | -1.514080 |
| O  | -3.039851 | 2.008248  | 0.345920  |
| O  | 2.388806  | -2.167197 | -0.757080 |
| O  | -0.942295 | -3.404924 | 0.562920  |
| O  | 0.293250  | 3.245975  | -0.973080 |

|   |           |           |           |
|---|-----------|-----------|-----------|
| O | 5.751149  | 2.016527  | 0.754920  |
| O | -6.401194 | -2.174476 | -1.164080 |
| O | 4.544627  | -4.355374 | 0.286920  |
| O | 0.927500  | 6.295923  | -0.071080 |
| O | 4.601148  | 2.003621  | -3.355080 |
| O | -5.251194 | -2.162571 | 2.944920  |
| O | -3.778785 | 2.811309  | -4.477080 |
| O | 3.127740  | -2.970258 | 4.065920  |
| O | -0.270419 | -4.912979 | -4.098080 |
| O | -0.380626 | 4.755030  | 3.686920  |
| O | -4.726450 | -5.293614 | -4.138080 |
| O | 7.042849  | -1.645579 | -2.504080 |
| O | -1.989457 | 6.820162  | -3.620080 |
| O | 4.830009  | 0.303602  | 3.376920  |
| O | -5.480054 | -0.461552 | -3.787080 |
| O | -3.841646 | 4.516314  | 2.257920  |
| O | 3.191600  | -4.675263 | -2.668080 |
| O | -3.109440 | -5.161746 | 2.237920  |
| O | 2.459394  | 5.002797  | -2.648080 |
| O | 4.076405  | 5.134664  | 3.728920  |
| N | -5.412388 | -4.530557 | -3.442080 |
| N | 6.568775  | -2.549540 | -1.800080 |
| N | -1.139447 | 6.933092  | -2.725080 |
| N | 4.143071  | 1.065659  | 4.071920  |
| N | -4.794117 | -1.224608 | -4.483080 |
| N | -4.315720 | 3.612353  | 2.960920  |
| N | 3.664675  | -3.770302 | -3.372080 |
| N | -2.258430 | -5.048816 | 3.132920  |
| N | 1.609385  | 4.889867  | -3.543080 |
| N | 4.761343  | 4.371608  | 3.032920  |
| O | -6.620372 | -4.343458 | -3.670080 |
| O | 7.027680  | -3.704578 | -1.819080 |
| O | -0.364368 | 7.902029  | -2.675080 |
| O | 2.936087  | 1.253758  | 3.844920  |
| O | -3.587132 | -1.411707 | -4.256080 |
| O | -3.856814 | 2.457315  | 2.942920  |
| O | 3.206769  | -2.616265 | -3.353080 |
| O | -1.484351 | -4.078880 | 3.182920  |
| O | 0.833306  | 3.919930  | -3.593080 |
| O | 5.969327  | 4.185509  | 3.259920  |
| O | -7.188136 | -1.462412 | 5.898920  |
| O | 2.827599  | -4.697233 | 7.211920  |
| O | 8.323965  | -0.228684 | 0.069920  |
| O | -2.560529 | 5.933209  | 4.830920  |
| O | -4.887338 | -3.927600 | -2.496080 |
| O | 5.606795  | -2.306461 | -1.059080 |
| O | -1.046519 | 6.055084  | -1.855080 |
| O | 4.668121  | 1.668616  | 5.017920  |
| O | -5.319166 | -1.827565 | -5.428080 |



|   |           |           |           |
|---|-----------|-----------|-----------|
| O | -5.277700 | 3.855432  | 3.701920  |
| O | 4.627655  | -4.014381 | -4.112080 |
| O | -2.166502 | -5.925824 | 4.001920  |
| O | 1.516457  | 5.767874  | -4.412080 |
| O | 4.237293  | 3.768651  | 2.086920  |
| O | -7.800050 | -0.410361 | 4.115920  |
| O | 2.589498  | -5.925214 | 5.450920  |
| O | 6.792946  | -0.465559 | 1.571920  |
| O | -4.092549 | 5.696334  | 6.334920  |
| O | 7.149005  | 0.251412  | -4.526080 |
| N | -7.886133 | -1.425354 | 4.844920  |
| N | 3.346539  | -5.419276 | 6.312920  |
| N | 7.763906  | -0.949638 | 0.944920  |
| N | -3.120588 | 5.212255  | 5.706920  |
| N | 7.236088  | 1.267405  | -5.256080 |
| O | -8.607209 | -2.357295 | 4.526920  |
| O | 4.552524  | -5.606375 | 6.263920  |
| O | 8.162814  | -2.074671 | 1.194920  |
| O | -2.720681 | 4.086222  | 5.956920  |
| O | 7.958164  | 2.198346  | -4.937080 |
| H | 2.672075  | 1.111779  | 1.839920  |
| H | -3.322120 | -1.269729 | -2.249080 |
| H | -3.190843 | 2.104260  | 1.059920  |
| H | 2.539798  | -2.263210 | -1.470080 |
| H | -1.103304 | -3.512911 | 1.272920  |
| H | 0.453259  | 3.354961  | -1.683080 |
| H | 4.528945  | -0.475373 | -1.074080 |
| H | -5.179990 | 0.317424  | 0.663920  |
| H | -2.101671 | 4.211171  | -1.912080 |
| H | 1.450625  | -4.370120 | 1.501920  |
| H | -2.799338 | -3.918772 | -2.106080 |
| H | 2.149293  | 3.760822  | 1.695920  |
| H | 1.444032  | 0.585880  | -1.602080 |
| H | -2.094077 | -0.743830 | 1.191920  |
| H | -1.438936 | 0.975117  | -1.987080 |
| H | 0.788891  | -1.133066 | 1.575920  |
| H | -0.327159 | -1.738975 | -1.870080 |
| H | -0.323886 | 1.580025  | 1.458920  |
| H | 2.938268  | 3.465758  | -1.290080 |
| H | -3.589313 | -3.623707 | 0.880920  |
| H | -4.674946 | 0.852382  | -2.350080 |
| H | 4.025901  | -1.010332 | 1.940920  |
| H | 1.385615  | -4.499115 | -1.598080 |
| H | -2.035660 | 4.339166  | 1.187920  |
| O | -4.513582 | 5.295369  | -3.248080 |
| O | -5.193672 | 4.196425  | -0.696080 |
| O | -6.387771 | 2.990523  | -3.103080 |
| O | -2.305563 | -6.667812 | -3.097080 |
| O | -1.577546 | -6.454872 | -0.339080 |

|   |           |           |           |
|---|-----------|-----------|-----------|
| O | 0.523400  | -7.115044 | -2.294080 |
| O | 6.538091  | 1.304462  | -6.309080 |
| H | -4.112851 | 2.012336  | -4.892080 |
| H | -3.186738 | 3.391260  | -4.960080 |
| H | -6.752843 | 2.103553  | -3.130080 |
| H | -6.929709 | 3.740567  | -3.360080 |
| H | -5.236563 | 5.525428  | -3.836080 |
| H | -3.860527 | 5.957315  | -3.008080 |
| H | -5.893708 | 3.749482  | -0.216080 |
| H | -4.865602 | 5.045398  | -0.387080 |
| H | -2.073613 | -7.272831 | -0.423080 |
| H | -1.411515 | -6.080886 | 0.529920  |
| H | 0.181327  | -8.007016 | -2.382080 |
| H | 1.471413  | -6.961122 | -2.294080 |
| H | -2.501635 | -7.549796 | -2.773080 |
| H | -2.765535 | -6.325775 | -3.866080 |
| H | -0.528465 | -5.466958 | -4.838080 |
| H | 0.240646  | -4.115021 | -4.251080 |
| H | -5.597253 | -2.883542 | 3.474920  |
| H | -4.764135 | -1.449611 | 3.363920  |
| H | -8.263178 | -1.974323 | 1.372920  |
| H | -7.615054 | -0.456377 | 1.568920  |
| H | -7.083379 | -4.419420 | 0.462920  |
| H | -6.043402 | -4.705506 | 1.727920  |
| H | -6.940255 | -2.917432 | -1.447080 |
| H | -6.236135 | -1.446490 | -1.767080 |
| H | 2.116490  | 6.167825  | 3.455920  |
| H | 1.852590  | 7.391847  | 2.360920  |
| H | -2.120458 | 6.802173  | 1.883920  |
| H | -0.833372 | 7.849067  | 1.971920  |
| H | -0.891691 | 3.957072  | 3.840920  |
| H | -0.122580 | 5.309009  | 4.426920  |
| H | 0.761470  | 5.921936  | -0.939080 |
| H | 1.423568  | 7.113882  | 0.012920  |
| H | 5.584090  | 1.287540  | 1.356920  |
| H | 6.289210  | 2.758483  | 1.037920  |
| H | 5.390357  | 4.547556  | -2.136080 |
| H | 6.433334  | 4.260471  | -0.874080 |
| H | 6.965008  | 0.297427  | -1.979080 |
| H | 7.613133  | 1.816374  | -1.783080 |
| H | 4.114090  | 1.290661  | -3.775080 |
| H | 4.947207  | 2.724593  | -3.885080 |
| H | 6.278664  | -3.898517 | 2.950920  |
| H | 6.101798  | -2.261502 | 2.720920  |
| H | 4.217557  | -5.202347 | -0.022080 |
| H | 5.244663  | -3.906432 | -0.192080 |
| H | 3.210482  | -6.116265 | 2.597920  |
| H | 4.587518  | -5.684378 | 3.424920  |
| H | 2.535693  | -3.550209 | 4.548920  |

H 3.462806 -2.171286 4.481920

XYZ of Ga<sub>8</sub>In<sub>5</sub>

193

|    |           |           |           |
|----|-----------|-----------|-----------|
| In | 4.873787  | 2.031745  | -1.197722 |
| In | -5.537755 | -2.329641 | 0.725042  |
| In | -4.417078 | 3.213365  | -2.424610 |
| In | 3.752112  | -3.511254 | 1.950928  |
| In | 0.079189  | 5.188439  | 1.793958  |
| Ga | -0.332493 | -0.148457 | -0.236329 |
| Ga | 2.752062  | -0.547103 | 0.101465  |
| Ga | -3.418047 | 0.250171  | -0.574125 |
| Ga | -1.530739 | 2.738874  | -0.354598 |
| Ga | 0.864751  | -3.035831 | -0.117062 |
| Ga | -2.191401 | -2.629585 | -0.658668 |
| Ga | 1.526433  | 2.331672  | 0.185986  |
| O  | 4.155990  | 0.095900  | -1.022736 |
| O  | -4.820975 | -0.392814 | 0.550079  |
| O  | -2.475600 | 3.567719  | -1.793326 |
| O  | 1.809615  | -3.864651 | 1.320667  |
| O  | -2.109839 | -3.945162 | -2.041900 |
| O  | 1.444889  | 3.646249  | 1.569193  |
| O  | 3.039200  | 2.909530  | -0.817574 |
| O  | -3.704168 | -3.207444 | 0.344892  |
| O  | -4.386535 | 1.212904  | -1.902514 |
| O  | 3.720548  | -1.509861 | 1.430854  |
| O  | 0.818489  | -4.432853 | -1.413585 |
| O  | -1.484458 | 4.134897  | 0.941900  |
| O  | 6.826903  | 1.321231  | -1.742473 |
| O  | -7.492886 | -1.618137 | 1.268813  |
| O  | 3.943354  | -5.524115 | 2.681127  |
| O  | 1.526624  | 6.398574  | 2.823746  |
| O  | 5.653520  | 4.028611  | -1.369042 |
| O  | -6.319490 | -4.326567 | 0.897357  |
| O  | 5.776026  | -3.183933 | 2.600719  |
| O  | -1.309026 | 6.816073  | 2.026818  |
| O  | 1.355986  | 0.521745  | -0.969108 |
| O  | -2.019936 | -0.820641 | 0.496404  |
| O  | -1.526667 | 0.933963  | -1.348138 |
| O  | 0.862699  | -1.231859 | 0.875459  |
| O  | -0.426138 | -1.787098 | -1.305937 |
| O  | -0.238845 | 1.490209  | 0.832281  |
| O  | 2.620118  | 1.075107  | 1.110155  |
| O  | -3.285086 | -1.373020 | -1.582837 |
| O  | -3.084794 | 1.876399  | 0.359649  |
| O  | 2.418829  | -2.174305 | -0.833333 |
| O  | -0.892841 | -3.502917 | 0.446605  |
| O  | 0.228873  | 3.205021  | -0.919285 |
| O  | 5.703796  | 2.028498  | 0.791623  |

|   |           |           |           |
|---|-----------|-----------|-----------|
| O | -6.368783 | -2.325437 | -1.263281 |
| O | 4.610532  | -4.349840 | 0.161204  |
| O | 0.807434  | 6.242052  | 0.060392  |
| O | 4.563100  | 2.098447  | -3.320394 |
| O | -5.228067 | -2.396361 | 2.847712  |
| O | -3.827294 | 2.787007  | -4.443657 |
| O | 3.161328  | -3.084913 | 3.969973  |
| O | -0.184459 | -4.881677 | -4.248902 |
| O | -0.481524 | 4.584771  | 3.775242  |
| O | -4.633010 | -5.339229 | -4.310019 |
| O | 7.066750  | -1.527580 | -2.554607 |
| O | -2.110601 | 6.803868  | -3.481966 |
| O | 4.807247  | 0.234518  | 3.367537  |
| O | -5.472232 | -0.531432 | -3.840194 |
| O | -3.934709 | 4.321321  | 2.331707  |
| O | 3.269741  | -4.619235 | -2.804389 |
| O | -3.032375 | -5.338878 | 2.071475  |
| O | 2.367408  | 5.040964  | -2.544157 |
| O | 3.968040  | 5.041290  | 3.838336  |
| N | -5.333766 | -4.605995 | -3.596934 |
| N | 6.607123  | -2.457070 | -1.874682 |
| N | -1.264649 | 6.909212  | -2.582210 |
| N | 4.105511  | 0.966760  | 4.079595  |
| N | -4.771476 | -1.264666 | -4.553279 |
| N | -4.394333 | 3.391855  | 3.010633  |
| N | 3.728350  | -3.688762 | -3.484292 |
| N | -2.185423 | -5.233516 | 2.971234  |
| N | 1.521455  | 4.935620  | -3.443913 |
| N | 4.667796  | 4.308039  | 3.125249  |
| O | -6.544357 | -4.434441 | -3.823327 |
| O | 7.086310  | -3.603049 | -1.921380 |
| O | -0.506839 | 7.890027  | -2.505964 |
| O | 2.895899  | 1.139306  | 3.854229  |
| O | -3.561882 | -1.436213 | -4.327888 |
| O | -3.915148 | 2.245852  | 2.964935  |
| O | 3.250181  | -2.543766 | -3.437617 |
| O | -1.428631 | -4.251720 | 3.047502  |
| O | 0.762663  | 3.953789  | -3.520187 |
| O | 5.878372  | 4.137509  | 3.350667  |
| O | -7.183414 | -1.804510 | 5.813250  |
| O | 2.884794  | -4.895186 | 7.070987  |
| O | 8.317175  | -0.153404 | 0.057366  |
| O | -2.684281 | 5.695522  | 4.942680  |
| O | -4.821450 | -4.017826 | -2.634779 |
| O | 5.639415  | -2.249536 | -1.130340 |
| O | -1.158178 | 6.011440  | -1.734211 |
| O | 4.617826  | 1.554929  | 5.041749  |
| O | -5.283794 | -1.852860 | -5.514433 |
| O | -5.362041 | 3.599390  | 3.754974  |

|   |           |           |           |
|---|-----------|-----------|-----------|
| O | 4.697073  | -3.897303 | -4.227656 |
| O | -2.079968 | -6.130281 | 3.818255  |
| O | 1.414983  | 5.833367  | -4.290912 |
| O | 4.156480  | 3.719888  | 2.163097  |
| O | -7.809873 | -0.718991 | 4.055543  |
| O | 2.672138  | -6.082631 | 5.279200  |
| O | 6.787310  | -0.454643 | 1.548976  |
| O | -4.215151 | 5.394215  | 6.436288  |
| O | 7.143905  | 0.421060  | -4.528228 |
| N | -7.879671 | -1.753288 | 4.758693  |
| N | 3.418297  | -5.585265 | 6.155557  |
| N | 7.767988  | -0.905766 | 0.912592  |
| N | -3.233470 | 4.943135  | 5.798906  |
| N | 7.214688  | 1.456399  | -5.232350 |
| O | -8.583557 | -2.689461 | 4.415598  |
| O | 4.627489  | -5.749912 | 6.105033  |
| O | 8.186077  | -2.029546 | 1.135404  |
| O | -2.814364 | 3.818372  | 6.021695  |
| O | 7.919589  | 2.391565  | -4.888278 |
| H | 2.638767  | 1.043016  | 1.845623  |
| H | -3.303754 | -1.339956 | -2.317281 |
| H | -3.238997 | 1.951826  | 1.075432  |
| H | 2.573029  | -2.249757 | -1.548116 |
| H | -1.053462 | -3.631469 | 1.153259  |
| H | 0.388477  | 3.334555  | -1.625916 |
| H | 4.529565  | -0.437819 | -1.102329 |
| H | -5.195550 | 0.140887  | 0.629669  |
| H | -2.180613 | 4.151325  | -1.840076 |
| H | 1.514645  | -4.449256 | 1.367391  |
| H | -2.734777 | -3.982181 | -2.239244 |
| H | 2.069792  | 3.685267  | 1.766587  |
| H | 1.427616  | 0.582103  | -1.611644 |
| H | -2.092602 | -0.879018 | 1.138987  |
| H | -1.460911 | 0.930279  | -1.994292 |
| H | 0.795928  | -1.227168 | 1.520636  |
| H | -0.301831 | -1.765990 | -1.942341 |
| H | -0.364134 | 1.468084  | 1.468656  |
| H | 2.870297  | 3.479003  | -1.223796 |
| H | -3.536284 | -3.775960 | 0.752136  |
| H | -4.693469 | 0.759984  | -2.368677 |
| H | 4.029481  | -1.056906 | 1.897022  |
| H | 1.458625  | -4.501637 | -1.735024 |
| H | -2.123575 | 4.202724  | 1.262317  |
| O | -4.608320 | 5.226226  | -3.154809 |
| O | -5.274502 | 4.051918  | -0.632883 |
| O | -6.441996 | 2.885976  | -3.072404 |
| O | -2.190590 | -6.696445 | -3.297425 |
| O | -1.472402 | -6.539966 | -0.533074 |
| O | 0.644056  | -7.114011 | -2.498501 |

|   |           |           |           |
|---|-----------|-----------|-----------|
| O | 6.518429  | 1.507596  | -6.285907 |
| H | -4.146357 | 1.992954  | -4.879386 |
| H | -3.244492 | 3.389169  | -4.910452 |
| H | -6.791354 | 1.993700  | -3.122538 |
| H | -6.996483 | 3.632613  | -3.311968 |
| H | -5.333960 | 5.458243  | -3.738750 |
| H | -3.967529 | 5.893294  | -2.896622 |
| H | -5.967608 | 3.580886  | -0.166041 |
| H | -4.962083 | 4.898500  | -0.301885 |
| H | -1.953825 | -7.364132 | -0.638805 |
| H | -1.314856 | -6.185023 | 0.345441  |
| H | 0.317913  | -8.009356 | -2.609681 |
| H | 1.589213  | -6.943546 | -2.492180 |
| H | -2.371822 | -7.589573 | -2.996106 |
| H | -2.654840 | -6.343356 | -4.058822 |
| H | -0.431119 | -5.421374 | -5.003200 |
| H | 0.312825  | -4.071301 | -4.380557 |
| H | -5.562541 | -3.136344 | 3.358604  |
| H | -4.754531 | -1.685699 | 3.285687  |
| H | -8.239486 | -2.221594 | 1.273075  |
| H | -7.618583 | -0.697910 | 1.508680  |
| H | -7.014903 | -4.622063 | 0.305259  |
| H | -5.972797 | -4.921491 | 1.565410  |
| H | -6.894081 | -3.070400 | -1.566184 |
| H | -6.215246 | -1.579786 | -1.847446 |
| H | 1.990854  | 6.046460  | 3.586168  |
| H | 1.707841  | 7.292726  | 2.521452  |
| H | -2.253181 | 6.645650  | 2.019501  |
| H | -0.984898 | 7.712407  | 2.137019  |
| H | -0.978810 | 3.774369  | 3.907897  |
| H | -0.234863 | 5.124467  | 4.529541  |
| H | 0.649886  | 5.887085  | -0.817123 |
| H | 1.288857  | 7.066218  | 0.166123  |
| H | 5.548279  | 1.281837  | 1.374758  |
| H | 6.228111  | 2.772444  | 1.094499  |
| H | 5.304808  | 4.624474  | -2.036075 |
| H | 6.349937  | 4.324174  | -0.778941 |
| H | 6.953615  | 0.399996  | -1.981362 |
| H | 7.574501  | 1.924680  | -1.745732 |
| H | 4.089565  | 1.387811  | -3.759368 |
| H | 4.897573  | 2.838430  | -3.831286 |
| H | 6.330496  | -3.929569 | 2.840308  |
| H | 6.125367  | -2.290656 | 2.650878  |
| H | 4.299078  | -5.194405 | -0.169742 |
| H | 5.303601  | -3.876833 | -0.304589 |
| H | 3.302561  | -6.191207 | 2.423940  |
| H | 4.669995  | -5.756114 | 3.265070  |
| H | 2.578527  | -3.687075 | 4.436768  |
| H | 3.481390  | -2.290868 | 4.406704  |

Ga -0.744157 -5.486353 -2.266640



XYZ of Ga<sub>9</sub>In<sub>4</sub>O

193

|    |          |          |          |
|----|----------|----------|----------|
| In | 5.02800  | 1.71500  | -1.15100 |
| In | -5.61100 | -2.08000 | 0.72800  |
| In | -4.17800 | 3.34700  | -2.49500 |
| In | 0.37200  | 5.15900  | 1.74000  |
| Ga | -0.29200 | -0.18200 | -0.21100 |
| Ga | 2.76500  | -0.73200 | 0.16600  |
| Ga | -3.34900 | 0.36700  | -0.58800 |
| Ga | -1.34000 | 2.76000  | -0.38700 |
| Ga | 0.75600  | -3.12500 | -0.03400 |
| Ga | -2.27000 | -2.57200 | -0.61500 |
| Ga | 1.68700  | 2.20600  | 0.19200  |
| O  | 4.21100  | -0.17900 | -0.95300 |
| O  | -4.79400 | -0.18600 | 0.53100  |
| O  | -2.22700 | 3.61200  | -1.84800 |
| O  | 1.64300  | -3.97700 | 1.42600  |
| O  | -2.24200 | -3.91200 | -1.97600 |
| O  | 1.65900  | 3.54500  | 1.55400  |
| O  | 3.23700  | 2.69000  | -0.80400 |
| O  | -3.82000 | -3.05600 | 0.38200  |
| O  | -4.25400 | 1.35600  | -1.94100 |
| O  | 3.67000  | -1.72100 | 1.52000  |
| O  | 0.65100  | -4.53800 | -1.30900 |
| O  | -1.23500 | 4.17200  | 0.88800  |
| O  | 6.94800  | 0.89700  | -1.66400 |
| O  | -7.53200 | -1.26200 | 1.24000  |
| O  | 3.67600  | -5.72100 | 2.83500  |
| O  | 1.86900  | 6.31000  | 2.76700  |
| O  | 5.91100  | 3.66600  | -1.34500 |
| O  | -6.49500 | -4.03200 | 0.92300  |
| O  | 5.62600  | -3.47900 | 2.73800  |
| O  | -0.93400 | 6.85800  | 1.93300  |
| O  | 1.43600  | 0.38900  | -0.93600 |
| O  | -2.01800 | -0.75600 | 0.51400  |
| O  | -1.41800 | 0.94100  | -1.35200 |
| O  | 0.83600  | -1.30700 | 0.93000  |
| O  | -0.45800 | -1.83100 | -1.25600 |
| O  | -0.12500 | 1.46600  | 0.83300  |
| O  | 2.70600  | 0.91100  | 1.14800  |
| O  | -3.28900 | -1.27700 | -1.57000 |
| O  | -2.94300 | 1.98900  | 0.32400  |
| O  | 2.35900  | -2.35500 | -0.74700 |
| O  | -1.02900 | -3.49300 | 0.51800  |
| O  | 0.44700  | 3.12700  | -0.94000 |
| O  | 5.83800  | 1.70100  | 0.84700  |
| O  | -6.42100 | -2.06600 | -1.26800 |

|   |          |          |          |
|---|----------|----------|----------|
| O | 4.42700  | -4.62300 | 0.30400  |
| O | 1.17000  | 6.14600  | -0.00200 |
| O | 4.74200  | 1.76300  | -3.27700 |
| O | -5.32600 | -2.12900 | 2.85500  |
| O | -3.59000 | 2.85900  | -4.50100 |
| O | 3.00600  | -3.22500 | 4.07700  |
| O | -0.34600 | -4.98100 | -4.14800 |
| O | -0.23800 | 4.61600  | 3.72500  |
| O | -4.81100 | -5.21200 | -4.24900 |
| O | 7.05000  | -1.97300 | -2.42900 |
| O | -1.68100 | 6.79800  | -3.58300 |
| O | 4.82500  | -0.00400 | 3.44100  |
| O | -5.40800 | -0.36100 | -3.86300 |
| O | -3.68600 | 4.50500  | 2.24900  |
| O | 3.10300  | -4.87100 | -2.67100 |
| O | -3.27500 | -5.19100 | 2.14800  |
| O | 2.69200  | 4.82500  | -2.57000 |
| O | 4.22800  | 4.84700  | 3.82800  |
| N | -5.48000 | -4.43300 | -3.55500 |
| N | 6.53700  | -2.86700 | -1.73900 |
| N | -0.83900 | 6.87500  | -2.67600 |
| N | 4.15500  | 0.77500  | 4.13400  |
| N | -4.73900 | -1.14100 | -4.55700 |
| N | -4.19900 | 3.61200  | 2.93700  |
| N | 3.61500  | -3.97600 | -3.36000 |
| N | -2.43300 | -5.11500 | 3.05500  |
| N | 1.85100  | 4.74900  | -3.47700 |
| N | 4.89600  | 4.06700  | 3.13400  |
| O | -6.67800 | -4.20400 | -3.79700 |
| O | 6.95800  | -4.03600 | -1.76300 |
| O | -0.03300 | 7.81700  | -2.60700 |
| O | 2.95800  | 1.00500  | 3.89300  |
| O | -3.54200 | -1.37000 | -4.31600 |
| O | -3.77900 | 2.44200  | 2.91400  |
| O | 3.19600  | -2.80800 | -3.33700 |
| O | -1.62800 | -4.17100 | 3.12400  |
| O | 1.04400  | 3.80600  | -3.54600 |
| O | 6.09400  | 3.83900  | 3.37500  |
| O | -7.27700 | -1.39100 | 5.79000  |
| O | 2.60700  | -4.96900 | 7.20300  |
| O | 8.34300  | -0.62200 | 0.17500  |
| O | -2.39300 | 5.85600  | 4.85100  |
| O | -4.94800 | -3.85600 | -2.59700 |
| O | 5.57400  | -2.59900 | -1.00900 |
| O | -0.78700 | 5.98700  | -1.81300 |
| O | 4.68700  | 1.35200  | 5.09200  |
| O | -5.27100 | -1.71700 | -5.51500 |
| O | -5.16200 | 3.88000  | 3.66800  |
| O | 4.57900  | -4.24600 | -4.09000 |

|   |          |          |          |
|---|----------|----------|----------|
| O | -2.38200 | -6.00200 | 3.91700  |
| O | 1.79900  | 5.63700  | -4.33900 |
| O | 4.36500  | 3.49100  | 2.17600  |
| O | -7.83000 | -0.30300 | 4.00900  |
| O | 2.35200  | -6.17200 | 5.42700  |
| O | 6.78500  | -0.82200 | 1.65400  |
| O | -3.95200 | 5.65700  | 6.33300  |
| O | 7.24600  | -0.06300 | -4.43100 |
| N | -7.96000 | -1.32100 | 4.72700  |
| N | 3.11400  | -5.70000 | 6.30400  |
| N | 7.74800  | -1.33200 | 1.03600  |
| N | -2.98800 | 5.14600  | 5.71300  |
| N | 7.37700  | 0.95600  | -5.15100 |
| O | -8.70700 | -2.22600 | 4.39100  |
| O | 4.31400  | -5.92600 | 6.26900  |
| O | 8.10600  | -2.47200 | 1.28000  |
| O | -2.62900 | 4.00500  | 5.95800  |
| O | 8.12500  | 1.86000  | -4.81400 |
| H | 2.71600  | 0.89000  | 1.88400  |
| H | -3.29900 | -1.25400 | -2.30500 |
| H | -3.10000 | 2.08400  | 1.03700  |
| H | 2.51600  | -2.45000 | -1.45900 |
| H | -1.20300 | -3.60100 | 1.22500  |
| H | 0.62000  | 3.23700  | -1.64700 |
| H | 4.55800  | -0.73200 | -1.02100 |
| H | -5.14200 | 0.36800  | 0.59800  |
| H | -1.90200 | 4.18000  | -1.90100 |
| H | 1.31800  | -4.54500 | 1.47900  |
| H | -2.86600 | -3.92100 | -2.18000 |
| H | 2.28300  | 3.55600  | 1.75800  |
| H | 1.51700  | 0.43600  | -1.57900 |
| H | -2.10000 | -0.80000 | 1.15700  |
| H | -1.34600 | 0.92400  | -1.99800 |
| H | 0.76300  | -1.28900 | 1.57400  |
| H | -0.32700 | -1.82700 | -1.89100 |
| H | -0.25700 | 1.46100  | 1.46800  |
| H | 3.10200  | 3.26100  | -1.22100 |
| H | -3.68600 | -3.62600 | 0.79900  |
| H | -4.57900 | 0.91200  | -2.40400 |
| H | 3.99700  | -1.27700 | 1.98200  |
| H | 1.29000  | -4.64500 | -1.62300 |
| H | -1.87300 | 4.27800  | 1.20100  |
| O | -4.25900 | 5.35500  | -3.25800 |
| O | -5.00900 | 4.25700  | -0.72500 |
| O | -6.21000 | 3.11300  | -3.15900 |
| O | -2.45100 | -6.67600 | -3.19000 |
| O | -1.75300 | -6.51200 | -0.42100 |
| O | 0.35100  | -7.22400 | -2.35400 |
| O | 6.69400  | 1.02600  | -6.21200 |

|    |          |          |          |
|----|----------|----------|----------|
| H  | -3.94500 | 2.07500  | -4.92700 |
| H  | -2.97300 | 3.42300  | -4.97000 |
| H  | -6.60400 | 2.23900  | -3.19900 |
| H  | -6.72300 | 3.88300  | -3.41600 |
| H  | -4.96600 | 5.61400  | -3.85300 |
| H  | -3.58700 | 5.99300  | -3.00300 |
| H  | -5.72900 | 3.82900  | -0.25900 |
| H  | -4.65700 | 5.09200  | -0.40400 |
| H  | -2.27500 | -7.31200 | -0.51900 |
| H  | -1.58600 | -6.15100 | 0.45400  |
| H  | -0.02000 | -8.10300 | -2.45500 |
| H  | 1.30300  | -7.10200 | -2.34100 |
| H  | -2.68100 | -7.55300 | -2.87700 |
| H  | -2.88900 | -6.31200 | -3.96200 |
| H  | -0.61200 | -5.51900 | -4.89600 |
| H  | 0.19400  | -4.19900 | -4.28700 |
| H  | -5.70200 | -2.84200 | 3.37400  |
| H  | -4.82100 | -1.43600 | 3.28700  |
| H  | -8.30800 | -1.82600 | 1.24600  |
| H  | -7.61300 | -0.33300 | 1.46400  |
| H  | -7.19800 | -4.30100 | 0.32900  |
| H  | -6.18500 | -4.63300 | 1.60400  |
| H  | -6.98000 | -2.78800 | -1.56500 |
| H  | -6.22300 | -1.33800 | -1.86200 |
| H  | 2.30700  | 5.94700  | 3.53900  |
| H  | 2.09800  | 7.18900  | 2.45200  |
| H  | -1.88500 | 6.73600  | 1.91800  |
| H  | -0.56500 | 7.73900  | 2.03300  |
| H  | -0.77800 | 3.83400  | 3.86500  |
| H  | 0.02800  | 5.15500  | 4.47300  |
| H  | 1.00300  | 5.78500  | -0.87500 |
| H  | 1.69200  | 6.94600  | 0.09700  |
| H  | 5.63800  | 0.97300  | 1.44000  |
| H  | 6.39600  | 2.42200  | 1.14400  |
| H  | 5.59900  | 4.26800  | -2.02500 |
| H  | 6.61500  | 3.93500  | -0.75200 |
| H  | 7.03000  | -0.03300 | -1.88700 |
| H  | 7.72500  | 1.46100  | -1.66800 |
| H  | 4.23800  | 1.07000  | -3.71000 |
| H  | 5.11900  | 2.47700  | -3.79600 |
| H  | 6.13900  | -4.24800 | 2.99500  |
| H  | 6.02000  | -2.60400 | 2.77800  |
| H  | 4.07600  | -5.45600 | -0.01700 |
| H  | 5.14700  | -4.19300 | -0.16200 |
| H  | 3.00400  | -6.35900 | 2.58100  |
| H  | 4.38400  | -5.98000 | 3.43000  |
| H  | 2.38900  | -3.78900 | 4.54700  |
| H  | 3.36200  | -2.44100 | 4.50500  |
| Ga | -0.95500 | -5.52400 | -2.16300 |

Ga 3.59400 -3.71300 2.07100

XYZ of Ga<sub>9</sub>In<sub>4</sub>m

193

|    |          |          |          |
|----|----------|----------|----------|
| In | -5.36900 | -2.52400 | 0.76900  |
| In | -4.50500 | 3.04200  | -2.42100 |
| In | 3.97200  | -3.31300 | 1.92200  |
| In | -0.05900 | 5.22600  | 1.74800  |
| Ga | -0.26600 | -0.13500 | -0.24900 |
| Ga | 2.83500  | -0.40400 | 0.06500  |
| Ga | -3.36900 | 0.13400  | -0.56300 |
| Ga | -1.58400 | 2.70000  | -0.37300 |
| Ga | 1.05000  | -2.96900 | -0.12400 |
| Ga | -2.02400 | -2.69300 | -0.64200 |
| Ga | 1.49200  | 2.42300  | 0.14400  |
| O  | 4.20100  | 0.29000  | -1.07500 |
| O  | -4.73400 | -0.56000 | 0.57700  |
| O  | -2.57400 | 3.48000  | -1.80800 |
| O  | 2.04100  | -3.75000 | 1.31000  |
| O  | -1.90000 | -4.01200 | -2.01800 |
| O  | 1.36700  | 3.74100  | 1.52100  |
| O  | 2.97100  | 3.05700  | -0.87600 |
| O  | -3.50400 | -3.32700 | 0.37800  |
| O  | -4.38700 | 1.04800  | -1.88800 |
| O  | 3.85300  | -1.31800 | 1.39100  |
| O  | 1.05100  | -4.37500 | -1.41200 |
| O  | -1.58500 | 4.10400  | 0.91600  |
| O  | 6.81300  | 1.62100  | -1.82400 |
| O  | -7.34700 | -1.89100 | 1.32500  |
| O  | 4.25200  | -5.31200 | 2.66200  |
| O  | 1.34500  | 6.50100  | 2.75900  |
| O  | 5.53200  | 4.28000  | -1.45500 |
| O  | -6.06600 | -4.55000 | 0.95900  |
| O  | 5.98600  | -2.89800 | 2.55300  |
| O  | -1.51200 | 6.79700  | 1.98400  |
| O  | 1.38700  | 0.60000  | -1.00000 |
| O  | -1.91800 | -0.87200 | 0.50200  |
| O  | -1.51400 | 0.89100  | -1.35600 |
| O  | 0.98200  | -1.16100 | 0.85900  |
| O  | -0.30100 | -1.78200 | -1.30900 |
| O  | -0.23200 | 1.51300  | 0.81000  |
| O  | 2.64400  | 1.21800  | 1.06600  |
| O  | -3.17700 | -1.48800 | -1.56300 |
| O  | -3.09500 | 1.77800  | 0.35900  |
| O  | 2.56100  | -2.04900 | -0.85800 |
| O  | -0.68200 | -3.50500 | 0.45700  |
| O  | 0.15000  | 3.23500  | -0.95500 |
| O  | 5.68300  | 2.29600  | 0.71600  |
| O  | -6.21600 | -2.56600 | -1.21200 |

|   |          |          |          |
|---|----------|----------|----------|
| O | 4.84900  | -4.12600 | 0.13000  |
| O | 0.61000  | 6.29900  | 0.00300  |
| O | 4.50600  | 2.29500  | -3.38700 |
| O | -5.03900 | -2.56500 | 2.88900  |
| O | -3.91400 | 2.62900  | -4.44200 |
| O | 3.38100  | -2.89900 | 3.94400  |
| O | 0.04400  | -4.88100 | -4.23600 |
| O | -0.57800 | 4.61200  | 3.73800  |
| O | -4.38200 | -5.52300 | -4.25700 |
| O | 7.16400  | -1.22000 | -2.62200 |
| O | -2.35800 | 6.71900  | -3.51800 |
| O | 4.88300  | 0.48200  | 3.30900  |
| O | -5.41500 | -0.75100 | -3.80700 |
| O | -4.02900 | 4.19700  | 2.32500  |
| O | 3.49700  | -4.46800 | -2.82300 |
| O | -2.73000 | -5.41900 | 2.11000  |
| O | 2.19700  | 5.14800  | -2.60800 |
| O | 3.84900  | 5.25200  | 3.76100  |
| N | -5.10600 | -4.81500 | -3.54200 |
| N | 6.74900  | -2.16400 | -1.93300 |
| N | -1.50900 | 6.86400  | -2.62600 |
| N | 4.15700  | 1.18800  | 4.02300  |
| N | -4.69100 | -1.45900 | -4.52200 |
| N | -4.44400 | 3.25300  | 3.01300  |
| N | 3.91100  | -3.52300 | -3.51200 |
| N | -1.88100 | -5.27300 | 3.00200  |
| N | 1.34900  | 5.00300  | -3.50000 |
| N | 4.57300  | 4.54400  | 3.04600  |
| O | -6.32500 | -4.69500 | -3.75900 |
| O | 7.27500  | -3.28900 | -1.97800 |
| O | -0.79200 | 7.87600  | -2.56100 |
| O | 2.94000  | 1.30900  | 3.80700  |
| O | -3.47300 | -1.57900 | -4.30600 |
| O | -3.91900 | 2.12800  | 2.97000  |
| O | 3.38600  | -2.39900 | -3.46700 |
| O | -1.16500 | -4.26100 | 3.06700  |
| O | 0.63100  | 3.99000  | -3.56400 |
| O | 5.79100  | 4.42500  | 3.26200  |
| O | -6.99300 | -2.03700 | 5.86800  |
| O | 3.20500  | -4.70100 | 7.05700  |
| O | 8.37800  | 0.22000  | -0.02900 |
| O | -2.81500 | 5.63700  | 4.91800  |
| O | -4.61100 | -4.20100 | -2.58800 |
| O | 5.78000  | -1.99200 | -1.18200 |
| O | -1.35900 | 5.97700  | -1.77400 |
| O | 4.65300  | 1.80300  | 4.97800  |
| O | -5.18600 | -2.07300 | -5.47500 |
| O | -5.41400 | 3.42500  | 3.76400  |
| O | 4.88100  | -3.69600 | -4.26200 |

|   |          |          |          |
|---|----------|----------|----------|
| O | -1.73100 | -6.16000 | 3.85300  |
| O | 1.19800  | 5.89000  | -4.35100 |
| O | 4.07800  | 3.93000  | 2.09100  |
| O | -7.67800 | -0.98900 | 4.10900  |
| O | 3.02700  | -5.90700 | 5.27400  |
| O | 6.87400  | -0.13600 | 1.47800  |
| O | -4.32000 | 5.28200  | 6.42600  |
| O | 7.14400  | 0.71800  | -4.60700 |
| N | -7.69900 | -2.02100 | 4.81900  |
| N | 3.75900  | -5.37400 | 6.14100  |
| N | 7.86800  | -0.55000 | 0.83500  |
| N | -3.32600 | 4.86800  | 5.78300  |
| N | 7.16600  | 1.75200  | -5.31700 |
| O | -8.36700 | -2.98800 | 4.48700  |
| O | 4.97300  | -5.48900 | 6.08100  |
| O | 8.33400  | -1.65400 | 1.06100  |
| O | -2.85900 | 3.76300  | 6.00800  |
| O | 7.83500  | 2.71700  | -4.98500 |
| H | 2.67000  | 1.19100  | 1.80100  |
| H | -3.20300 | -1.46000 | -2.29800 |
| H | -3.24600 | 1.85100  | 1.07600  |
| H | 2.71300  | -2.12200 | -1.57400 |
| H | -0.83100 | -3.63600 | 1.16600  |
| H | 0.29800  | 3.36700  | -1.66400 |
| H | 4.59600  | -0.22800 | -1.15400 |
| H | -5.13000 | -0.04200 | 0.65700  |
| H | -2.30400 | 4.07500  | -1.86100 |
| H | 1.77000  | -4.34600 | 1.36300  |
| H | -2.52400 | -4.07600 | -2.21000 |
| H | 1.99100  | 3.80700  | 1.71200  |
| H | 1.45100  | 0.66000  | -1.64300 |
| H | -1.98300 | -0.92900 | 1.14500  |
| H | -1.45300 | 0.88600  | -2.00300 |
| H | 0.92000  | -1.15600 | 1.50400  |
| H | -0.18300 | -1.76000 | -1.94600 |
| H | -0.35100 | 1.48900  | 1.44700  |
| H | 2.77500  | 3.61600  | -1.28300 |
| H | -3.30900 | -3.88600 | 0.78700  |
| H | -4.67900 | 0.58000  | -2.34900 |
| H | 4.14700  | -0.84900 | 1.85200  |
| H | 1.69100  | -4.41900 | -1.73900 |
| H | -2.22400 | 4.14700  | 1.24100  |
| O | -4.78500 | 5.04100  | -3.16000 |
| O | -5.38100 | 3.85500  | -0.62700 |
| O | -6.52000 | 2.62800  | -3.05000 |
| O | -1.87700 | -6.77200 | -3.25800 |
| O | -1.14300 | -6.57000 | -0.50100 |
| O | 0.97900  | -7.06700 | -2.48100 |
| O | 6.46000  | 1.76800  | -6.36500 |



|    |          |          |          |
|----|----------|----------|----------|
| H  | -4.20400 | 1.82000  | -4.87100 |
| H  | -3.36100 | 3.25200  | -4.91700 |
| H  | -6.83200 | 1.72100  | -3.09200 |
| H  | -7.10600 | 3.34900  | -3.28900 |
| H  | -5.52500 | 5.24000  | -3.74000 |
| H  | -4.17000 | 5.73600  | -2.91100 |
| H  | -6.05000 | 3.35900  | -0.15100 |
| H  | -5.10100 | 4.71600  | -0.30300 |
| H  | -1.59100 | -7.41400 | -0.59800 |
| H  | -0.99300 | -6.20300 | 0.37500  |
| H  | 0.68900  | -7.97600 | -2.58400 |
| H  | 1.91600  | -6.85800 | -2.48300 |
| H  | -2.01900 | -7.67000 | -2.95000 |
| H  | -2.36200 | -6.44300 | -4.01700 |
| H  | -0.18600 | -5.43500 | -4.98500 |
| H  | 0.50700  | -4.05200 | -4.37700 |
| H  | -5.33800 | -3.31500 | 3.40700  |
| H  | -4.59200 | -1.83300 | 3.31900  |
| H  | -8.06800 | -2.52400 | 1.33900  |
| H  | -7.50900 | -0.97500 | 1.56100  |
| H  | -6.75300 | -4.87800 | 0.37400  |
| H  | -5.68900 | -5.12600 | 1.62700  |
| H  | -6.71200 | -3.33300 | -1.50700 |
| H  | -6.09800 | -1.81800 | -1.80200 |
| H  | 1.83000  | 6.17300  | 3.52000  |
| H  | 1.48700  | 7.40000  | 2.45000  |
| H  | -2.44800 | 6.58700  | 1.98600  |
| H  | -1.22400 | 7.70600  | 2.08700  |
| H  | -1.04000 | 3.78200  | 3.87900  |
| H  | -0.34800 | 5.16600  | 4.48700  |
| H  | 0.46000  | 5.93300  | -0.87100 |
| H  | 1.05800  | 7.14300  | 0.10000  |
| H  | 5.56300  | 1.54700  | 1.30400  |
| H  | 6.17800  | 3.06300  | 1.01000  |
| H  | 5.15300  | 4.85700  | -2.12300 |
| H  | 6.22000  | 4.60700  | -0.87300 |
| H  | 6.97600  | 0.70400  | -2.05900 |
| H  | 7.53500  | 2.25500  | -1.83700 |
| H  | 4.05900  | 1.56200  | -3.81800 |
| H  | 4.80600  | 3.04500  | -3.90400 |
| H  | 6.57300  | -3.61900 | 2.79200  |
| H  | 6.29800  | -1.99100 | 2.59500  |
| H  | 4.57100  | -4.98400 | -0.19400 |
| H  | 5.51800  | -3.62700 | -0.34400 |
| H  | 3.63800  | -6.00600 | 2.41400  |
| H  | 4.99300  | -5.51000 | 3.24100  |
| H  | 2.82700  | -3.52200 | 4.41900  |
| H  | 3.67100  | -2.09000 | 4.37300  |
| Ga | -0.47300 | -5.49700 | -2.24600 |

Ga 4.83700 2.25300 -1.26600

XYZ of Ga<sub>9</sub>In<sub>4</sub>p

193

|    |          |          |          |
|----|----------|----------|----------|
| In | 4.87200  | 2.13000  | -1.12800 |
| In | -5.53400 | -2.28600 | 0.69800  |
| In | -4.42000 | 3.32500  | -2.33200 |
| In | 3.75800  | -3.48000 | 1.90100  |
| Ga | -0.33100 | -0.07700 | -0.21500 |
| Ga | 2.75400  | -0.47900 | 0.11500  |
| Ga | -3.41700 | 0.32400  | -0.54500 |
| Ga | -1.53400 | 2.81000  | -0.27200 |
| Ga | 0.87000  | -2.96500 | -0.15700 |
| Ga | -2.18700 | -2.55200 | -0.69100 |
| Ga | 1.52400  | 2.39600  | 0.26100  |
| O  | 4.15700  | 0.19000  | -0.99500 |
| O  | -4.82000 | -0.34500 | 0.56500  |
| O  | -2.47900 | 3.66800  | -1.69300 |
| O  | 1.81600  | -3.82300 | 1.26300  |
| O  | -2.10300 | -3.83700 | -2.10200 |
| O  | 1.44000  | 3.68000  | 1.67200  |
| O  | 3.03600  | 2.99700  | -0.73000 |
| O  | -3.69900 | -3.15300 | 0.30000  |
| O  | -4.38700 | 1.31300  | -1.85300 |
| O  | 3.72300  | -1.46800 | 1.42400  |
| O  | 0.82600  | -4.33400 | -1.48300 |
| O  | -1.49000 | 4.17800  | 1.05400  |
| O  | 6.82600  | 1.43400  | -1.68800 |
| O  | -7.49000 | -1.58900 | 1.25700  |
| O  | 3.95200  | -5.50800 | 2.58800  |
| O  | 1.51800  | 6.40500  | 2.98500  |
| O  | 5.64900  | 4.13100  | -1.25700 |
| O  | -6.31200 | -4.28700 | 0.82800  |
| O  | 5.78100  | -3.16400 | 2.55800  |
| O  | -1.31800 | 6.83600  | 2.19600  |
| O  | 1.35600  | 0.61100  | -0.93300 |
| O  | -2.01800 | -0.76800 | 0.50300  |
| O  | -1.52700 | 1.02700  | -1.30400 |
| O  | 0.86500  | -1.18300 | 0.87400  |
| O  | -0.42200 | -1.69300 | -1.31900 |
| O  | -0.24000 | 1.53800  | 0.88800  |
| O  | 2.61900  | 1.12100  | 1.15800  |
| O  | -3.28200 | -1.27700 | -1.58800 |
| O  | -3.08700 | 1.93000  | 0.42400  |
| O  | 2.42300  | -2.08600 | -0.85500 |
| O  | -0.88700 | -3.44700 | 0.39600  |
| O  | 0.22500  | 3.29100  | -0.82600 |
| O  | 5.70200  | 2.08600  | 0.86100  |
| O  | -6.36400 | -2.24100 | -1.28900 |

|   |          |          |          |
|---|----------|----------|----------|
| O | 4.61800  | -4.27900 | 0.09400  |
| O | 0.79900  | 6.30700  | 0.21900  |
| O | 4.56200  | 2.24200  | -3.24900 |
| O | -5.22400 | -2.39800 | 2.81900  |
| O | -3.83000 | 2.94200  | -4.35900 |
| O | 3.16600  | -3.09800 | 3.92800  |
| O | -0.17600 | -4.72400 | -4.32800 |
| O | -0.48800 | 4.56900  | 3.89700  |
| O | -4.62400 | -5.18600 | -4.40000 |
| O | 7.07000  | -1.39600 | -2.56100 |
| O | -2.11900 | 6.94000  | -3.31200 |
| O | 4.80700  | 0.23600  | 3.39700  |
| O | -5.47000 | -0.39100 | -3.82700 |
| O | -3.94000 | 4.33100  | 2.44700  |
| O | 3.27800  | -4.48700 | -2.87700 |
| O | -3.02400 | -5.32000 | 1.98100  |
| O | 2.36200  | 5.16400  | -2.41100 |
| O | 3.96100  | 5.03000  | 3.97100  |
| N | -5.32600 | -4.46900 | -3.67100 |
| N | 6.61200  | -2.34100 | -1.90100 |
| N | -1.27300 | 7.02700  | -2.41000 |
| N | 4.10400  | 0.95200  | 4.12500  |
| N | -4.76800 | -1.10700 | -4.55600 |
| N | -4.39900 | 3.38700  | 3.10600  |
| N | 3.73500  | -3.54200 | -3.53700 |
| N | -2.17800 | -5.23300 | 2.88300  |
| N | 1.51600  | 5.07700  | -3.31300 |
| N | 4.66200  | 4.31300  | 3.24200  |
| O | -6.53600 | -4.29500 | -3.89400 |
| O | 7.09300  | -3.48500 | -1.97200 |
| O | -0.51700 | 8.00700  | -2.31200 |
| O | 2.89400  | 1.12700  | 3.90300  |
| O | -3.55800 | -1.28200 | -4.33400 |
| O | -3.91800 | 2.24300  | 3.03600  |
| O | 3.25500  | -2.39900 | -3.46600 |
| O | -1.42200 | -4.25200 | 2.98000  |
| O | 0.75900  | 4.09600  | -3.41000 |
| O | 5.87300  | 4.14000  | 3.46400  |
| O | -7.18100 | -1.87200 | 5.79600  |
| O | 2.89100  | -4.97500 | 6.99000  |
| O | 8.31800  | -0.07600 | 0.08000  |
| O | -2.69200 | 5.65100  | 5.08700  |
| O | -4.81400 | -3.90100 | -2.69700 |
| O | 5.64400  | -2.15000 | -1.15200 |
| O | -1.16600 | 6.11200  | -1.58100 |
| O | 4.61600  | 1.52000  | 5.09900  |
| O | -5.27900 | -1.67600 | -5.52900 |
| O | -5.36700 | 3.57700  | 3.85500  |
| O | 4.70400  | -3.73300 | -4.28400 |

|   |          |          |          |
|---|----------|----------|----------|
| O | -2.07100 | -6.14700 | 3.71000  |
| O | 1.40800  | 5.99200  | -4.14000 |
| O | 4.15200  | 3.74500  | 2.26800  |
| O | -7.80900 | -0.75000 | 4.06200  |
| O | 2.68100  | -6.12400 | 5.17300  |
| O | 6.78900  | -0.41200 | 1.56500  |
| O | -4.22300 | 5.31600  | 6.57400  |
| O | 7.14500  | 0.59400  | -4.49200 |
| N | -7.87700 | -1.80000 | 4.74300  |
| N | 3.42600  | -5.64400 | 6.06000  |
| N | 7.77000  | -0.84800 | 0.91900  |
| N | -3.24100 | 4.88000  | 5.92700  |
| N | 7.21400  | 1.64500  | -5.17400 |
| O | -8.58000 | -2.72900 | 4.38000  |
| O | 4.63600  | -5.80600 | 6.00600  |
| O | 8.19000  | -1.97500 | 1.11800  |
| O | -2.82000 | 3.75100  | 6.12600  |
| O | 7.91800  | 2.57300  | -4.81000 |
| H | 2.63800  | 1.07300  | 1.89300  |
| H | -3.30000 | -1.22800 | -2.32200 |
| H | -3.24100 | 1.99000  | 1.14100  |
| H | 2.57700  | -2.14600 | -1.57100 |
| H | -1.04800 | -3.59000 | 1.10000  |
| H | 0.38500  | 3.43600  | -1.53000 |
| H | 4.53100  | -0.34100 | -1.08600 |
| H | -5.19500 | 0.18600  | 0.65600  |
| H | -2.18500 | 4.25300  | -1.72700 |
| H | 1.52200  | -4.40900 | 1.29700  |
| H | -2.72800 | -3.87100 | -2.30000 |
| H | 2.06500  | 3.71600  | 1.87000  |
| H | 1.42800  | 0.68500  | -1.57400 |
| H | -2.09100 | -0.84000 | 1.14400  |
| H | -1.46100 | 1.03700  | -1.95000 |
| H | 0.79800  | -1.19200 | 1.51900  |
| H | -0.29800 | -1.65800 | -1.95500 |
| H | -0.36600 | 1.50200  | 1.52400  |
| H | 2.86600  | 3.57500  | -1.12400 |
| H | -3.53000 | -3.73000 | 0.69500  |
| H | -4.69300 | 0.87000  | -2.32800 |
| H | 4.03200  | -1.02500 | 1.89900  |
| H | 1.46600  | -4.39500 | -1.80600 |
| H | -2.12900 | 4.23800  | 1.37600  |
| O | -4.61400 | 5.35200  | -3.01900 |
| O | -5.27900 | 4.12300  | -0.52300 |
| O | -6.44500 | 3.00800  | -2.98700 |
| O | -2.17900 | -6.56100 | -3.41600 |
| O | -1.46200 | -6.46300 | -0.64900 |
| O | 0.65600  | -6.99200 | -2.62500 |
| O | 6.51800  | 1.71700  | -6.22600 |

|    |          |          |          |
|----|----------|----------|----------|
| H  | -4.14700 | 2.15700  | -4.81200 |
| H  | -3.24800 | 3.55500  | -4.81300 |
| H  | -6.79300 | 2.11700  | -3.05600 |
| H  | -7.00000 | 3.75900  | -3.21000 |
| H  | -5.34000 | 5.59600  | -3.59800 |
| H  | -3.97500 | 6.01500  | -2.74600 |
| H  | -5.97200 | 3.64100  | -0.06600 |
| H  | -4.96800 | 4.96300  | -0.17400 |
| H  | -1.94200 | -7.28500 | -0.77200 |
| H  | -1.30500 | -6.12600 | 0.23700  |
| H  | 0.33100  | -7.88500 | -2.75600 |
| H  | 1.60100  | -6.82000 | -2.61500 |
| H  | -2.35900 | -7.46100 | -3.13400 |
| H  | -2.64400 | -6.19300 | -4.17000 |
| H  | -0.42200 | -5.24700 | -5.09400 |
| H  | 0.32000  | -3.91000 | -4.44200 |
| H  | -5.55800 | -3.14900 | 3.31400  |
| H  | -4.75200 | -1.69600 | 3.27200  |
| H  | -8.23600 | -2.19400 | 1.24800  |
| H  | -7.61700 | -0.67500 | 1.51600  |
| H  | -7.00700 | -4.57100 | 0.22900  |
| H  | -5.96500 | -4.89600 | 1.48300  |
| H  | -6.88800 | -2.98000 | -1.60800 |
| H  | -6.21200 | -1.48200 | -1.85800 |
| H  | 1.98200  | 6.03800  | 3.74000  |
| H  | 1.69800  | 7.30600  | 2.70200  |
| H  | -2.26200 | 6.66400  | 2.18500  |
| H  | -0.99500 | 7.73000  | 2.32600  |
| H  | -0.98400 | 3.75500  | 4.01200  |
| H  | -0.24200 | 5.09200  | 4.66300  |
| H  | 0.64200  | 5.97100  | -0.66600 |
| H  | 1.28000  | 7.12900  | 0.34200  |
| H  | 5.54700  | 1.32600  | 1.42800  |
| H  | 6.22500  | 2.82400  | 1.17900  |
| H  | 5.29900  | 4.74100  | -1.91100 |
| H  | 6.34500  | 4.41500  | -0.66000 |
| H  | 6.95400  | 0.51900  | -1.94600 |
| H  | 7.57300  | 2.03900  | -1.67800 |
| H  | 4.08900  | 1.54000  | -3.70300 |
| H  | 4.89500  | 2.99300  | -3.74400 |
| H  | 6.33700  | -3.91400 | 2.78200  |
| H  | 6.12900  | -2.27200 | 2.62700  |
| H  | 4.30700  | -5.11700 | -0.25500 |
| H  | 5.31000  | -3.79500 | -0.36200 |
| H  | 3.31200  | -6.17000 | 2.31600  |
| H  | 4.67900  | -5.75200 | 3.16700  |
| H  | 2.58400  | -3.71100 | 4.38200  |
| H  | 3.48500  | -2.31300 | 4.38200  |
| Ga | -0.73500 | -5.37100 | -2.35900 |

Ga 0.07200 5.21500 1.92900

XYZ of Ga<sub>10</sub>In<sub>3</sub>a

193

|    |           |           |           |
|----|-----------|-----------|-----------|
| In | -5.459691 | -2.255648 | 0.770072  |
| In | -4.253182 | 3.204908  | -2.489959 |
| In | 0.262171  | 5.201813  | 1.697833  |
| Ga | -0.221729 | -0.169244 | -0.223520 |
| Ga | 2.856090  | -0.604881 | 0.129677  |
| Ga | -3.300549 | 0.266390  | -0.576722 |
| Ga | -1.378234 | 2.731868  | -0.403826 |
| Ga | 0.933771  | -3.070364 | -0.042218 |
| Ga | -2.115118 | -2.631722 | -0.599273 |
| Ga | 1.671663  | 2.292234  | 0.152229  |
| O  | 4.271414  | -0.005229 | -1.004152 |
| O  | -4.714872 | -0.333259 | 0.557113  |
| O  | -2.308138 | 3.544391  | -1.861486 |
| O  | 1.863680  | -3.882882 | 1.414441  |
| O  | -2.049548 | -3.976470 | -1.955031 |
| O  | 1.606096  | 3.635982  | 1.507982  |
| O  | 3.194631  | 2.827687  | -0.859392 |
| O  | -3.638086 | -3.167175 | 0.412347  |
| O  | -4.252388 | 1.215363  | -1.926868 |
| O  | 3.807925  | -1.553859 | 1.480823  |
| O  | 0.870182  | -4.492924 | -1.309917 |
| O  | -1.314642 | 4.153428  | 0.863868  |
| O  | 6.961096  | 1.166784  | -1.742551 |
| O  | -7.405550 | -1.505271 | 1.294506  |
| O  | 3.970599  | -5.544352 | 2.813700  |
| O  | 1.724660  | 6.412052  | 2.706003  |
| O  | 5.825854  | 3.897748  | -1.427513 |
| O  | -6.270314 | -4.237243 | 0.981464  |
| O  | 5.836776  | -3.232730 | 2.689641  |
| O  | -1.103060 | 6.853548  | 1.893972  |
| O  | 1.477694  | 0.461577  | -0.965896 |
| O  | -1.920146 | -0.802062 | 0.518852  |
| O  | -1.397965 | 0.907051  | -1.360121 |
| O  | 0.955510  | -1.246536 | 0.913082  |
| O  | -0.336628 | -1.828009 | -1.259509 |
| O  | -0.106826 | 1.489526  | 0.811469  |
| O  | 2.745313  | 1.039428  | 1.104563  |
| O  | -3.188769 | -1.378916 | -1.551608 |
| O  | -2.945964 | 1.906533  | 0.324282  |
| O  | 2.501514  | -2.246020 | -0.772331 |
| O  | -0.831498 | -3.500620 | 0.526752  |
| O  | 0.389043  | 3.161135  | -0.973791 |
| O  | 5.842988  | 1.941933  | 0.773840  |
| O  | -6.286451 | -2.280425 | -1.219879 |
| O  | 4.659754  | -4.431745 | 0.271805  |



|   |           |           |           |
|---|-----------|-----------|-----------|
| O | 1.009029  | 6.209079  | -0.055253 |
| O | 4.711936  | 1.943673  | -3.341435 |
| O | -5.155391 | -2.283161 | 2.894391  |
| O | -3.665384 | 2.728779  | -4.498435 |
| O | 3.220934  | -3.068266 | 4.050386  |
| O | -0.133215 | -4.985533 | -4.137796 |
| O | -0.311239 | 4.647046  | 3.689751  |
| O | -4.587729 | -5.380659 | -4.200039 |
| O | 7.161781  | -1.701245 | -2.495508 |
| O | -1.893309 | 6.739620  | -3.615284 |
| O | 4.915491  | 0.214241  | 3.383882  |
| O | -5.358949 | -0.552729 | -3.830922 |
| O | -3.764845 | 4.403344  | 2.243757  |
| O | 3.321390  | -4.742832 | -2.690802 |
| O | -3.000482 | -5.272065 | 2.183873  |
| O | 2.557027  | 4.932577  | -2.630918 |
| O | 4.144270  | 5.041167  | 3.753995  |
| N | -5.279383 | -4.622996 | -3.503805 |
| N | 6.687475  | -2.609911 | -1.797748 |
| N | -1.047801 | 6.851334  | -2.715879 |
| N | 4.222845  | 0.970906  | 4.079107  |
| N | -4.667295 | -1.310392 | -4.527156 |
| N | -4.239146 | 3.494682  | 2.940517  |
| N | 3.794692  | -3.833169 | -3.388561 |
| N | -2.153974 | -5.160348 | 3.083283  |
| N | 1.711518  | 4.820863  | -3.530323 |
| N | 4.834923  | 4.283500  | 3.057756  |
| O | -6.486921 | -4.438856 | -3.736533 |
| O | 7.150289  | -3.763334 | -1.819795 |
| O | -0.276175 | 7.822584  | -2.657976 |
| O | 3.016299  | 1.156044  | 3.847388  |
| O | -3.460753 | -1.494531 | -4.295433 |
| O | -3.776337 | 2.341254  | 2.919470  |
| O | 3.332882  | -2.680743 | -3.366514 |
| O | -1.383351 | -4.188101 | 3.141186  |
| O | 0.938896  | 3.848610  | -3.588235 |
| O | 6.042462  | 4.100365  | 3.289489  |
| O | -7.108198 | -1.602642 | 5.842530  |
| O | 2.912063  | -4.810313 | 7.187218  |
| O | 8.426352  | -0.291697 | 0.090679  |
| O | -2.500269 | 5.812896  | 4.828944  |
| O | -4.760688 | -4.022562 | -2.552709 |
| O | 5.721300  | -2.373328 | -1.060112 |
| O | -0.955962 | 5.969744  | -1.849393 |
| O | 4.741540  | 1.571340  | 5.030203  |
| O | -5.185995 | -1.910831 | -5.477252 |
| O | -5.205321 | 3.731265  | 3.678153  |
| O | 4.761866  | -4.070753 | -4.125197 |
| O | -2.063134 | -6.040937 | 3.948769  |

|   |           |           |           |
|---|-----------|-----------|-----------|
| O | 1.619675  | 5.702449  | -4.395809 |
| O | 4.317228  | 3.683069  | 2.106665  |
| O | -7.715395 | -0.544627 | 4.061448  |
| O | 2.686129  | -6.031161 | 5.419668  |
| O | 6.889240  | -0.540347 | 1.584531  |
| O | -4.038391 | 5.564234  | 6.324791  |
| O | 7.270940  | 0.205135  | -4.508497 |
| N | -7.801463 | -1.563157 | 4.785499  |
| N | 3.437520  | -5.526603 | 6.287402  |
| N | 7.864670  | -1.018409 | 0.959856  |
| N | -3.061955 | 5.086180  | 5.699121  |
| N | 7.358009  | 1.224674  | -5.233539 |
| O | -8.517978 | -2.496032 | 4.460016  |
| O | 4.644331  | -5.709507 | 6.243126  |
| O | 8.266152  | -2.143232 | 1.206661  |
| O | -2.659471 | 3.960360  | 5.945927  |
| O | 8.075522  | 2.156547  | -4.907056 |
| H | 2.761976  | 1.022191  | 1.840578  |
| H | -3.205439 | -1.360684 | -2.286618 |
| H | -3.100553 | 1.998844  | 1.038001  |
| H | 2.656098  | -2.338336 | -1.485050 |
| H | -0.995409 | -3.612319 | 1.235512  |
| H | 0.551951  | 3.273831  | -1.682552 |
| H | 4.637468  | -0.545751 | -1.071896 |
| H | -5.081926 | 0.207260  | 0.624852  |
| H | -2.004723 | 4.122640  | -1.919499 |
| H | 1.560268  | -4.462131 | 1.472450  |
| H | -2.674542 | -4.008605 | -2.153051 |
| H | 2.231084  | 3.670117  | 1.706012  |
| H | 1.551513  | 0.507693  | -1.609364 |
| H | -1.994972 | -0.846181 | 1.162324  |
| H | -1.330929 | 0.889155  | -2.005907 |
| H | 0.887476  | -1.227638 | 1.557867  |
| H | -0.210712 | -1.821757 | -1.895916 |
| H | -0.233738 | 1.482271  | 1.447867  |
| H | 3.034747  | 3.391048  | -1.277608 |
| H | -3.479210 | -3.729544 | 0.831564  |
| H | -4.564813 | 0.757391  | -2.384367 |
| H | 4.122350  | -1.095881 | 1.938331  |
| H | 1.509932  | -4.577434 | -1.628362 |
| H | -1.953384 | 4.236946  | 1.181314  |
| O | -4.414050 | 5.204869  | -3.261745 |
| O | -5.102214 | 4.092255  | -0.717845 |
| O | -6.281236 | 2.893235  | -3.135690 |
| O | -2.167110 | -6.751532 | -3.154043 |
| O | -1.452484 | -6.548567 | -0.391791 |
| O | 0.659600  | -7.193041 | -2.340016 |
| O | 6.664739  | 1.264154  | -6.289570 |
| H | -3.994889 | 1.930580  | -4.918538 |

|    |           |           |           |
|----|-----------|-----------|-----------|
| H  | -3.073049 | 3.312838  | -4.976103 |
| H  | -6.643239 | 2.005197  | -3.168338 |
| H  | -6.824471 | 3.642635  | -3.391831 |
| H  | -5.135080 | 5.435180  | -3.852037 |
| H  | -3.764303 | 5.867879  | -3.015780 |
| H  | -5.802964 | 3.640861  | -0.243080 |
| H  | -4.778384 | 4.940910  | -0.403544 |
| H  | -1.945447 | -7.367771 | -0.481733 |
| H  | -1.291689 | -6.177937 | 0.479628  |
| H  | 0.320893  | -8.085731 | -2.433578 |
| H  | 1.607087  | -7.035998 | -2.334957 |
| H  | -2.361745 | -7.635601 | -2.834896 |
| H  | -2.624675 | -6.407565 | -3.923618 |
| H  | -0.386020 | -5.537034 | -4.881446 |
| H  | 0.375901  | -4.185218 | -4.284869 |
| H  | -5.501491 | -3.007639 | 3.419562  |
| H  | -4.672629 | -1.570487 | 3.318815  |
| H  | -8.160727 | -2.097787 | 1.309379  |
| H  | -7.518545 | -0.578608 | 1.515148  |
| H  | -6.968661 | -4.534879 | 0.393907  |
| H  | -5.933566 | -4.823208 | 1.662397  |
| H  | -6.821741 | -3.023876 | -1.508680 |
| H  | -6.121036 | -1.549202 | -1.818852 |
| H  | 2.182216  | 6.069081  | 3.476583  |
| H  | 1.919296  | 7.297125  | 2.385860  |
| H  | -2.049542 | 6.696514  | 1.887918  |
| H  | -0.766351 | 7.747236  | 1.986529  |
| H  | -0.820359 | 3.846727  | 3.837825  |
| H  | -0.058434 | 5.198548  | 4.433402  |
| H  | 0.848230  | 5.838445  | -0.925672 |
| H  | 1.501991  | 7.028283  | 0.034688  |
| H  | 5.675581  | 1.209707  | 1.371798  |
| H  | 6.377281  | 2.684380  | 1.062631  |
| H  | 5.487098  | 4.484701  | -2.107451 |
| H  | 6.525210  | 4.195395  | -0.841952 |
| H  | 7.075089  | 0.239120  | -1.962192 |
| H  | 7.717269  | 1.759299  | -1.756419 |
| H  | 4.229178  | 1.231004  | -3.766859 |
| H  | 5.058035  | 2.668151  | -3.866606 |
| H  | 6.380008  | -3.981131 | 2.945786  |
| H  | 6.198776  | -2.343693 | 2.722293  |
| H  | 4.336917  | -5.278396 | -0.042482 |
| H  | 5.360493  | -3.978355 | -0.201951 |
| H  | 3.320847  | -6.207367 | 2.568736  |
| H  | 4.692629  | -5.774661 | 3.403997  |
| H  | 2.628598  | -3.652325 | 4.528054  |
| H  | 3.551434  | -2.270068 | 4.471494  |
| Ga | -0.705626 | -5.541301 | -2.144878 |
| Ga | 3.809731  | -3.544392 | 2.041915  |

Ga 5.017236 1.916163 -1.217112

XYZ of Ga<sub>10</sub>In<sub>3</sub>b

193

|    |           |           |           |
|----|-----------|-----------|-----------|
| In | 5.022072  | 1.839058  | -1.085373 |
| In | -5.592574 | -2.065968 | 0.703195  |
| In | -4.193561 | 3.437829  | -2.403592 |
| Ga | -0.285738 | -0.112942 | -0.191081 |
| Ga | 2.774308  | -0.649721 | 0.177004  |
| Ga | -3.346784 | 0.423864  | -0.559179 |
| Ga | -1.353562 | 2.825259  | -0.305924 |
| Ga | 0.781073  | -3.051146 | -0.075251 |
| Ga | -2.248066 | -2.506997 | -0.646792 |
| Ga | 1.676564  | 2.280115  | 0.264601  |
| O  | 4.217381  | -0.063910 | -0.928735 |
| O  | -4.788857 | -0.161974 | 0.546574  |
| O  | -2.245212 | 3.702506  | -1.749906 |
| O  | 1.672737  | -3.928363 | 1.367732  |
| O  | -2.209950 | -3.817843 | -2.036381 |
| O  | 1.638422  | 3.589961  | 1.654159  |
| O  | 3.224177  | 2.795405  | -0.719720 |
| O  | -3.795679 | -3.022288 | 0.337529  |
| O  | -4.257294 | 1.435352  | -1.892334 |
| O  | 3.684805  | -1.661238 | 1.511160  |
| O  | 0.686954  | -4.438127 | -1.379938 |
| O  | -1.259470 | 4.211241  | 0.998732  |
| O  | 6.947557  | 1.045396  | -1.613437 |
| O  | -7.520018 | -1.271222 | 1.230264  |
| O  | 3.716078  | -5.687733 | 2.741372  |
| O  | 1.828464  | 6.329534  | 2.924789  |
| O  | 5.891297  | 3.800221  | -1.237354 |
| O  | -6.463813 | -4.027106 | 0.856149  |
| O  | 5.651375  | -3.430762 | 2.693311  |
| O  | -0.977150 | 6.876443  | 2.100333  |
| O  | 1.438574  | 0.485429  | -0.902274 |
| O  | -2.009104 | -0.713338 | 0.520065  |
| O  | -1.418734 | 1.027022  | -1.309387 |
| O  | 0.848231  | -1.253931 | 0.927209  |
| O  | -0.440340 | -1.740354 | -1.270713 |
| O  | -0.131122 | 1.514501  | 0.887552  |
| O  | 2.703484  | 0.971592  | 1.193251  |
| O  | -3.274987 | -1.198474 | -1.575442 |
| O  | -2.951908 | 2.028939  | 0.387086  |
| O  | 2.379421  | -2.255765 | -0.770290 |
| O  | -1.001460 | -3.442678 | 0.467242  |
| O  | 0.430958  | 3.215768  | -0.849420 |
| O  | 5.829623  | 1.788879  | 0.912566  |
| O  | -6.401112 | -2.014793 | -1.293728 |
| O  | 4.461751  | -4.531401 | 0.235194  |

|   |           |           |           |
|---|-----------|-----------|-----------|
| O | 1.132886  | 6.219126  | 0.153176  |
| O | 4.737550  | 1.930274  | -3.210801 |
| O | -5.309053 | -2.157157 | 2.828609  |
| O | -3.601505 | 2.996009  | -4.418646 |
| O | 3.029018  | -3.222835 | 4.035442  |
| O | -0.304259 | -4.827594 | -4.228126 |
| O | -0.268202 | 4.601768  | 3.844953  |
| O | -4.767794 | -5.087068 | -4.338701 |
| O | 7.069717  | -1.807081 | -2.438825 |
| O | -1.719032 | 6.927830  | -3.416582 |
| O | 4.826762  | 0.023348  | 3.468866  |
| O | -5.398238 | -0.249232 | -3.851027 |
| O | -3.713900 | 4.499087  | 2.363636  |
| O | 3.142398  | -4.725970 | -2.745827 |
| O | -3.237619 | -5.190178 | 2.059222  |
| O | 2.666117  | 4.963296  | -2.441414 |
| O | 4.196278  | 4.860155  | 3.957509  |
| N | -5.443030 | -4.327111 | -3.628980 |
| N | 6.562063  | -2.718717 | -1.768965 |
| N | -0.878995 | 6.990970  | -2.507382 |
| N | 4.150514  | 0.782363  | 4.177543  |
| N | -4.723002 | -1.009189 | -4.560747 |
| N | -4.221541 | 3.587480  | 3.032497  |
| N | 3.649079  | -3.813307 | -3.415671 |
| N | -2.396582 | -5.127065 | 2.968436  |
| N | 1.826080  | 4.900155  | -3.350614 |
| N | 4.870514  | 4.100225  | 3.247775  |
| O | -6.642323 | -4.100882 | -3.867171 |
| O | 6.990492  | -3.884569 | -1.816978 |
| O | -0.079348 | 7.936807  | -2.417695 |
| O | 2.952234  | 1.009535  | 3.940396  |
| O | -3.524695 | -1.235361 | -4.323569 |
| O | -3.793126 | 2.421598  | 2.985483  |
| O | 3.221624  | -2.648481 | -3.367675 |
| O | -1.597908 | -4.180202 | 3.058139  |
| O | 1.025406  | 3.953346  | -3.440344 |
| O | 6.069847  | 3.875025  | 3.484997  |
| O | -7.268126 | -1.494256 | 5.776605  |
| O | 2.639143  | -5.034814 | 7.123252  |
| O | 8.351550  | -0.503025 | 0.193791  |
| O | -2.432054 | 5.803173  | 4.995253  |
| O | -4.915568 | -3.767147 | -2.658221 |
| O | 5.596528  | -2.472255 | -1.033728 |
| O | -0.821547 | 6.085057  | -1.663312 |
| O | 4.677977  | 1.342327  | 5.148303  |
| O | -5.250478 | -1.569182 | -5.530508 |
| O | -5.187075 | 3.833943  | 3.767734  |
| O | 4.615573  | -4.060825 | -4.149925 |
| O | -2.340094 | -6.031922 | 3.811523  |

|   |           |           |           |
|---|-----------|-----------|-----------|
| O | 1.768618  | 5.806039  | -4.193684 |
| O | 4.344052  | 3.540235  | 2.277029  |
| O | -7.826895 | -0.373091 | 4.018452  |
| O | 2.393428  | -6.202527 | 5.322747  |
| O | 6.793848  | -0.743697 | 1.667485  |
| O | -3.990784 | 5.562467  | 6.470933  |
| O | 7.254393  | 0.146235  | -4.400657 |
| N | -7.950019 | -1.406838 | 4.715065  |
| N | 3.151394  | -5.743211 | 6.209678  |
| N | 7.760385  | -1.234629 | 1.038981  |
| N | -3.023233 | 5.071539  | 5.841442  |
| N | 7.378557  | 1.180985  | -5.098225 |
| O | -8.690943 | -2.309112 | 4.359365  |
| O | 4.352580  | -5.961069 | 6.170994  |
| O | 8.125856  | -2.376966 | 1.259937  |
| O | -2.656789 | 3.928175  | 6.062381  |
| O | 8.120440  | 2.082202  | -4.741543 |
| H | 2.712762  | 0.934965  | 1.928686  |
| H | -3.284251 | -1.160878 | -2.309847 |
| H | -3.110328 | 2.107489  | 1.101611  |
| H | 2.537826  | -2.334344 | -1.483816 |
| H | -1.175229 | -3.567573 | 1.171437  |
| H | 0.603754  | 3.341689  | -1.553598 |
| H | 4.567784  | -0.613261 | -1.007350 |
| H | -5.140260 | 0.387404  | 0.625175  |
| H | -1.924175 | 4.272683  | -1.790296 |
| H | 1.351674  | -4.499539 | 1.408092  |
| H | -2.833750 | -3.826102 | -2.240507 |
| H | 2.262275  | 3.600219  | 1.858346  |
| H | 1.519733  | 0.545820  | -1.543673 |
| H | -2.091208 | -0.771703 | 1.161512  |
| H | -1.346242 | 1.023712  | -1.954822 |
| H | 0.774780  | -1.249566 | 1.571662  |
| H | -0.308365 | -1.721542 | -1.905642 |
| H | -0.264123 | 1.494716  | 1.522438  |
| H | 3.085055  | 3.373869  | -1.124528 |
| H | -3.657545 | -3.599755 | 0.743353  |
| H | -4.578945 | 0.998869  | -2.364220 |
| H | 4.008455  | -1.224809 | 1.983072  |
| H | 1.326844  | -4.533600 | -1.694986 |
| H | -1.898372 | 4.305718  | 1.312764  |
| O | -4.287566 | 5.460881  | -3.124563 |
| O | -5.032268 | 4.304461  | -0.616373 |
| O | -6.223890 | 3.203876  | -3.074516 |
| O | -2.398953 | -6.556413 | -3.307967 |
| O | -1.704388 | -6.446008 | -0.535367 |
| O | 0.405634  | -7.103356 | -2.481525 |
| O | 6.696650  | 1.268372  | -6.158766 |
| H | -3.950713 | 2.219116  | -4.862125 |

|    |           |           |           |
|----|-----------|-----------|-----------|
| H  | -2.987603 | 3.574096  | -4.875913 |
| H  | -6.611871 | 2.328239  | -3.133293 |
| H  | -6.742144 | 3.975580  | -3.315759 |
| H  | -4.995878 | 5.727822  | -3.714825 |
| H  | -3.620676 | 6.097548  | -2.855927 |
| H  | -5.750552 | 3.862265  | -0.159493 |
| H  | -4.686241 | 5.134658  | -0.277396 |
| H  | -2.220678 | -7.247461 | -0.650751 |
| H  | -1.540755 | -6.102877 | 0.346720  |
| H  | 0.041368  | -7.982776 | -2.601116 |
| H  | 1.357291  | -6.975014 | -2.464289 |
| H  | -2.622809 | -7.442145 | -3.013546 |
| H  | -2.838870 | -6.179212 | -4.072243 |
| H  | -0.566437 | -5.351975 | -4.987974 |
| H  | 0.229824  | -4.039412 | -4.350022 |
| H  | -5.681466 | -2.884165 | 3.331823  |
| H  | -4.809251 | -1.470435 | 3.275498  |
| H  | -8.292620 | -1.840984 | 1.223295  |
| H  | -7.607407 | -0.347557 | 1.473904  |
| H  | -7.165207 | -4.288451 | 0.255115  |
| H  | -6.151037 | -4.640213 | 1.524502  |
| H  | -6.955598 | -2.734173 | -1.606292 |
| H  | -6.208406 | -1.273723 | -1.872086 |
| H  | 2.268393  | 5.953301  | 3.690095  |
| H  | 2.052361  | 7.216295  | 2.629400  |
| H  | -1.927793 | 6.748104  | 2.082111  |
| H  | -0.614842 | 7.756947  | 2.218928  |
| H  | -0.802299 | 3.813556  | 3.967847  |
| H  | -0.006024 | 5.126148  | 4.604800  |
| H  | 0.969239  | 5.875965  | -0.727912 |
| H  | 1.649176  | 7.020579  | 0.268560  |
| H  | 5.634905  | 1.046894  | 1.489868  |
| H  | 6.383082  | 2.507288  | 1.225087  |
| H  | 5.576535  | 4.414350  | -1.904704 |
| H  | 6.593719  | 4.061598  | -0.638306 |
| H  | 7.035905  | 0.120675  | -1.856096 |
| H  | 7.721144  | 1.615100  | -1.605456 |
| H  | 4.237762  | 1.243582  | -3.658689 |
| H  | 5.109964  | 2.657282  | -3.714014 |
| H  | 6.169655  | -4.201467 | 2.934584  |
| H  | 6.039381  | -2.554126 | 2.752118  |
| H  | 4.116777  | -5.359626 | -0.103709 |
| H  | 5.180075  | -4.087237 | -0.220626 |
| H  | 3.049174  | -6.324431 | 2.473735  |
| H  | 4.425390  | -5.954702 | 3.331648  |
| H  | 2.415115  | -3.800921 | 4.492708  |
| H  | 3.379211  | -2.445999 | 4.479933  |
| Ga | -0.911535 | -5.416927 | -2.255271 |
| Ga | 3.622072  | -3.664682 | 2.020401  |



Ga 0.340033 5.190044 1.873080

XYZ Ga<sub>10</sub>In<sub>3</sub>c

193

|    |           |           |           |
|----|-----------|-----------|-----------|
| In | -5.576068 | -2.145786 | 0.689759  |
| In | 3.682516  | -3.464435 | 2.009006  |
| In | 0.168016  | 5.293495  | 1.626113  |
| Ga | -0.325990 | -0.080625 | -0.284069 |
| Ga | 2.748532  | -0.526366 | 0.084889  |
| Ga | -3.401512 | 0.365116  | -0.653037 |
| Ga | -1.471214 | 2.824137  | -0.477152 |
| Ga | 0.818225  | -2.985389 | -0.089996 |
| Ga | -2.226386 | -2.537261 | -0.662678 |
| Ga | 1.574406  | 2.375010  | 0.094538  |
| O  | 4.171376  | 0.065364  | -1.043678 |
| O  | -4.823356 | -0.226615 | 0.475540  |
| O  | -2.391252 | 3.636300  | -1.941259 |
| O  | 1.738272  | -3.797550 | 1.373111  |
| O  | -2.159187 | -3.885648 | -2.014736 |
| O  | 1.507207  | 3.722398  | 1.446594  |
| O  | 3.104081  | 2.902465  | -0.911148 |
| O  | -3.756061 | -3.064716 | 0.343007  |
| O  | -4.343506 | 1.314078  | -2.010077 |
| O  | 3.690517  | -1.475330 | 1.442929  |
| O  | 0.755570  | -4.410905 | -1.354417 |
| O  | -1.408559 | 4.248653  | 0.787267  |
| O  | 6.868727  | 1.225892  | -1.772177 |
| O  | -7.521697 | -1.387140 | 1.203029  |
| O  | 3.832538  | -5.463006 | 2.786556  |
| O  | 1.630020  | 6.501038  | 2.638211  |
| O  | 5.741798  | 3.961681  | -1.469395 |
| O  | -6.394788 | -4.123933 | 0.902245  |
| O  | 5.707560  | -3.158388 | 2.665608  |
| O  | -1.192201 | 6.950588  | 1.811603  |
| O  | 1.379198  | 0.542245  | -1.019912 |
| O  | -2.030178 | -0.705496 | 0.451779  |
| O  | -1.492937 | 0.996998  | -1.428958 |
| O  | 0.841957  | -1.159248 | 0.860826  |
| O  | -0.441904 | -1.741576 | -1.316437 |
| O  | -0.210067 | 1.580328  | 0.747299  |
| O  | 2.639014  | 1.120781  | 1.055115  |
| O  | -3.290994 | -1.283031 | -1.623255 |
| O  | -3.045341 | 2.006248  | 0.245538  |
| O  | 2.392370  | -2.168496 | -0.814688 |
| O  | -0.951263 | -3.407898 | 0.471626  |
| O  | 0.300283  | 3.245648  | -1.039758 |
| O  | 5.741443  | 2.011373  | 0.736905  |
| O  | -6.393432 | -2.172626 | -1.304044 |
| O  | 4.537767  | -4.359280 | 0.245197  |

|   |           |           |           |
|---|-----------|-----------|-----------|
| O | 0.926815  | 6.293663  | -0.125909 |
| O | 4.630001  | 2.006780  | -3.383707 |
| O | -5.281981 | -2.169031 | 2.815567  |
| O | -3.738849 | 2.818898  | -4.582599 |
| O | 3.085879  | -2.981146 | 4.013449  |
| O | -0.236118 | -4.907053 | -4.185805 |
| O | -0.416852 | 4.745805  | 3.616657  |
| O | -4.691674 | -5.286414 | -4.268298 |
| O | 7.062709  | -1.644725 | -2.516984 |
| O | -1.956627 | 6.825595  | -3.701055 |
| O | 4.795346  | 0.293593  | 3.346814  |
| O | -5.447326 | -0.454843 | -3.914953 |
| O | -3.864389 | 4.510801  | 2.154828  |
| O | 3.212409  | -4.673051 | -2.722969 |
| O | -3.134446 | -5.167398 | 2.122819  |
| O | 2.482466  | 5.005148  | -2.690959 |
| O | 4.039685  | 5.124162  | 3.701157  |
| N | -5.383912 | -4.524531 | -3.577269 |
| N | 6.581833  | -2.549928 | -1.819221 |
| N | -1.115014 | 6.936554  | -2.797912 |
| N | 4.102117  | 1.054479  | 4.036832  |
| N | -4.755088 | -1.216727 | -4.605982 |
| N | -4.345256 | 3.605599  | 2.851592  |
| N | 3.692285  | -3.766847 | -3.420740 |
| N | -2.291832 | -5.056439 | 3.025971  |
| N | 1.640852  | 4.894189  | -3.594103 |
| N | 4.730923  | 4.362279  | 3.010119  |
| O | -6.589661 | -4.336664 | -3.816212 |
| O | 7.040607  | -3.705050 | -1.836172 |
| O | -0.340195 | 7.905183  | -2.738763 |
| O | 2.897360  | 1.243343  | 3.798900  |
| O | -3.550330 | -1.404591 | -4.368048 |
| O | -3.886490 | 2.450476  | 2.835640  |
| O | 3.234510  | -2.612726 | -3.403781 |
| O | -1.518013 | -4.086810 | 3.085113  |
| O | 0.865033  | 3.924560  | -3.653263 |
| O | 5.936681  | 4.175414  | 3.248064  |
| O | -7.246343 | -1.474107 | 5.752648  |
| O | 2.755840  | -4.714165 | 7.153125  |
| O | 8.320004  | -0.233189 | 0.071665  |
| O | -2.607085 | 5.922338  | 4.742477  |
| O | -4.867600 | -3.923558 | -2.625217 |
| O | 5.613012  | -2.308035 | -1.086794 |
| O | -1.030461 | 6.056829  | -1.928793 |
| O | 4.618430  | 1.655451  | 4.988884  |
| O | -5.271410 | -1.817701 | -5.557034 |
| O | -5.314076 | 3.847493  | 3.584018  |
| O | 4.662096  | -4.009743 | -4.152159 |
| O | -2.208270 | -5.935162 | 3.894083  |

|   |           |           |           |
|---|-----------|-----------|-----------|
| O | 1.556291  | 5.773912  | -4.462222 |
| O | 4.215610  | 3.761306  | 2.058076  |
| O | -7.841260 | -0.418422 | 3.966048  |
| O | 2.533944  | -5.938650 | 5.387580  |
| O | 6.774918  | -0.472578 | 1.558789  |
| O | -4.153189 | 5.682946  | 6.231592  |
| O | 7.188280  | 0.256172  | -4.534198 |
| N | -7.934424 | -1.434810 | 4.692228  |
| N | 3.283001  | -5.434594 | 6.257621  |
| N | 7.751590  | -0.955696 | 0.939971  |
| N | -3.175508 | 5.199830  | 5.611784  |
| N | 7.282454  | 1.273561  | -5.261367 |
| O | -8.652722 | -2.365936 | 4.365669  |
| O | 4.489345  | -5.621921 | 6.219558  |
| O | 8.147857  | -2.081320 | 1.191504  |
| O | -2.778242 | 4.073205  | 5.863324  |
| O | 8.001742  | 2.203685  | -4.933801 |
| H | 2.652112  | 1.105340  | 1.791241  |
| H | -3.304101 | -1.266593 | -2.358380 |
| H | -3.202993 | 2.100911  | 0.958278  |
| H | 2.550013  | -2.263161 | -1.526428 |
| H | -1.118945 | -3.517224 | 1.179875  |
| H | 0.466965  | 3.355974  | -1.748013 |
| H | 4.535808  | -0.476632 | -1.108322 |
| H | -5.188788 | 0.315382  | 0.540174  |
| H | -2.085493 | 4.213313  | -1.999272 |
| H | 1.432513  | -4.375563 | 1.431122  |
| H | -2.783343 | -3.916049 | -2.215653 |
| H | 2.131363  | 3.754799  | 1.647515  |
| H | 1.456243  | 0.586475  | -1.663133 |
| H | -2.108223 | -0.747725 | 1.094995  |
| H | -1.422893 | 0.977233  | -2.074369 |
| H | 0.770923  | -1.138482 | 1.505231  |
| H | -0.312939 | -1.737379 | -1.952250 |
| H | -0.340031 | 1.575131  | 1.383100  |
| H | 2.948210  | 3.465338  | -1.331531 |
| H | -3.601199 | -3.626590 | 0.764383  |
| H | -4.655390 | 0.856074  | -2.467913 |
| H | 4.004401  | -1.017326 | 1.900783  |
| H | 1.396521  | -4.498503 | -1.669596 |
| H | -2.048501 | 4.335252  | 1.101454  |
| O | -4.484508 | 5.300757  | -3.355696 |
| O | -5.188756 | 4.197028  | -0.812328 |
| O | -6.360550 | 2.996136  | -3.232758 |
| O | -2.280991 | -6.663287 | -3.207342 |
| O | -1.578795 | -6.455913 | -0.442232 |
| O | 0.540212  | -7.112840 | -2.378744 |
| O | 6.594364  | 1.312856  | -6.320787 |
| H | -4.069211 | 2.020825  | -5.002268 |

|    |           |           |           |
|----|-----------|-----------|-----------|
| H  | -3.142157 | 3.399631  | -5.058898 |
| H  | -6.725575 | 2.109318  | -3.264907 |
| H  | -6.899869 | 3.746825  | -3.493361 |
| H  | -5.201891 | 5.532155  | -3.949995 |
| H  | -3.833566 | 5.962060  | -3.108297 |
| H  | -5.893371 | 3.749339  | -0.339781 |
| H  | -4.863384 | 5.045309  | -0.498613 |
| H  | -2.074258 | -7.273574 | -0.532471 |
| H  | -1.420821 | -6.083665 | 0.429014  |
| H  | 0.198756  | -8.004548 | -2.471684 |
| H  | 1.488221  | -6.959173 | -2.369561 |
| H  | -2.480311 | -7.545847 | -2.886914 |
| H  | -2.733652 | -6.319629 | -3.979949 |
| H  | -0.487357 | -5.459521 | -4.929270 |
| H  | 0.276558  | -4.108936 | -4.332454 |
| H  | -5.633172 | -2.890940 | 3.340894  |
| H  | -4.798692 | -1.457019 | 3.240501  |
| H  | -8.279056 | -1.976915 | 1.215784  |
| H  | -7.632418 | -0.459527 | 1.420808  |
| H  | -7.091393 | -4.420551 | 0.312112  |
| H  | -6.063387 | -4.709378 | 1.586241  |
| H  | -6.930003 | -2.914884 | -1.593530 |
| H  | -6.222548 | -1.443511 | -1.904050 |
| H  | 2.082672  | 6.158378  | 3.411820  |
| H  | 1.829350  | 7.384601  | 2.316784  |
| H  | -2.139201 | 6.796922  | 1.801430  |
| H  | -0.852735 | 7.843298  | 1.903527  |
| H  | -0.929537 | 3.947686  | 3.764306  |
| H  | -0.165613 | 5.298273  | 4.360122  |
| H  | 0.768832  | 5.921412  | -0.996154 |
| H  | 1.422278  | 7.111324  | -0.035670 |
| H  | 5.568568  | 1.281261  | 1.335891  |
| H  | 6.277014  | 2.752632  | 1.026380  |
| H  | 5.408389  | 4.548125  | -2.152408 |
| H  | 6.439422  | 4.258303  | -0.881253 |
| H  | 6.980438  | 0.297276  | -1.988948 |
| H  | 7.627077  | 1.815665  | -1.783923 |
| H  | 4.146722  | 1.294770  | -3.809642 |
| H  | 4.981192  | 2.728690  | -3.909035 |
| H  | 6.246880  | -3.908077 | 2.926213  |
| H  | 6.072586  | -2.270570 | 2.697759  |
| H  | 4.213395  | -5.205562 | -0.068505 |
| H  | 5.242373  | -3.909593 | -0.226347 |
| H  | 3.181586  | -6.124310 | 2.540157  |
| H  | 4.550920  | -5.694404 | 3.380864  |
| H  | 2.489186  | -3.561879 | 4.489748  |
| H  | 3.417231  | -2.183075 | 4.434127  |
| Ga | -0.819996 | -5.455746 | -2.194254 |
| Ga | 4.925088  | 1.983536  | -1.257890 |

Ga -4.334487 3.302187 -2.578147

XYZ of Ga<sub>11</sub>In<sub>2</sub>O

193

|    |           |           |           |
|----|-----------|-----------|-----------|
| In | -5.445286 | -2.230993 | 0.743041  |
| In | -4.265169 | 3.302475  | -2.401670 |
| Ga | -0.217619 | -0.097311 | -0.203247 |
| Ga | 2.862208  | -0.524312 | 0.142919  |
| Ga | -3.298447 | 0.329682  | -0.549420 |
| Ga | -1.389025 | 2.800917  | -0.323863 |
| Ga | 0.952781  | -2.995572 | -0.081637 |
| Ga | -2.098014 | -2.561169 | -0.631535 |
| Ga | 1.662783  | 2.365548  | 0.225015  |
| O  | 4.275067  | 0.106141  | -0.977193 |
| O  | -4.710306 | -0.300762 | 0.570698  |
| O  | -2.322276 | 3.638828  | -1.764917 |
| O  | 1.886037  | -3.833457 | 1.358417  |
| O  | -2.024692 | -3.877014 | -2.014973 |
| O  | 1.589470  | 3.680393  | 1.608428  |
| O  | 3.183546  | 2.929825  | -0.774178 |
| O  | -3.618777 | -3.125446 | 0.367658  |
| O  | -4.254401 | 1.301658  | -1.880155 |
| O  | 3.818157  | -1.496313 | 1.474655  |
| O  | 0.897298  | -4.391714 | -1.378746 |
| O  | -1.333533 | 4.196059  | 0.973220  |
| O  | 6.959074  | 1.307163  | -1.689154 |
| O  | -7.395308 | -1.501767 | 1.281654  |
| O  | 4.000715  | -5.512823 | 2.724206  |
| O  | 1.692960  | 6.431469  | 2.864114  |
| O  | 5.809525  | 4.025068  | -1.318063 |
| O  | -6.245760 | -4.220723 | 0.912537  |
| O  | 5.854970  | -3.189511 | 2.649628  |
| O  | -1.136534 | 6.875183  | 2.059508  |
| O  | 1.478946  | 0.557613  | -0.931146 |
| O  | -1.913169 | -0.754226 | 0.524606  |
| O  | -1.398750 | 0.996348  | -1.317987 |
| O  | 0.964520  | -1.191961 | 0.911472  |
| O  | -0.323324 | -1.734697 | -1.273654 |
| O  | -0.111909 | 1.540101  | 0.866159  |
| O  | 2.742351  | 1.098729  | 1.151779  |
| O  | -3.177582 | -1.294350 | -1.558299 |
| O  | -2.952885 | 1.952502  | 0.385809  |
| O  | 2.516659  | -2.148106 | -0.793334 |
| O  | -0.810567 | -3.446703 | 0.477026  |
| O  | 0.376337  | 3.251090  | -0.883541 |
| O  | 5.835504  | 2.023917  | 0.842070  |
| O  | -6.270748 | -2.218563 | -1.247565 |
| O  | 4.685580  | -4.343940 | 0.206522  |
| O  | 0.979998  | 6.282392  | 0.098735  |

|   |           |           |           |
|---|-----------|-----------|-----------|
| O | 4.706853  | 2.105577  | -3.273055 |
| O | -5.142084 | -2.301198 | 2.866535  |
| O | -3.673745 | 2.871348  | -4.419224 |
| O | 3.237519  | -3.066952 | 4.011699  |
| O | -0.101889 | -4.830459 | -4.216967 |
| O | -0.334344 | 4.635855  | 3.809467  |
| O | -4.554261 | -5.247203 | -4.290504 |
| O | 7.175046  | -1.543477 | -2.501569 |
| O | -1.922976 | 6.872012  | -3.451470 |
| O | 4.915445  | 0.237439  | 3.414906  |
| O | -5.350684 | -0.432061 | -3.821400 |
| O | -3.785800 | 4.404506  | 2.356327  |
| O | 3.350569  | -4.600127 | -2.762847 |
| O | -2.971314 | -5.263477 | 2.095380  |
| O | 2.536084  | 5.067856  | -2.501900 |
| O | 4.119025  | 5.051557  | 3.884983  |
| N | -5.250234 | -4.507796 | -3.579111 |
| N | 6.705045  | -2.468925 | -1.823222 |
| N | -1.078581 | 6.969323  | -2.549350 |
| N | 4.218485  | 0.975864  | 4.125268  |
| N | -4.654711 | -1.171468 | -4.532793 |
| N | -4.255795 | 3.479084  | 3.033674  |
| N | 3.819561  | -3.673688 | -3.441174 |
| N | -2.125919 | -5.166157 | 2.997506  |
| N | 1.691689  | 4.970544  | -3.404020 |
| N | 4.813998  | 4.312141  | 3.173585  |
| O | -6.458573 | -4.325085 | -3.808785 |
| O | 7.173838  | -3.619232 | -1.868978 |
| O | -0.312028 | 7.943128  | -2.470689 |
| O | 3.011133  | 1.159558  | 3.896625  |
| O | -3.447366 | -1.354162 | -4.304125 |
| O | -3.787008 | 2.328751  | 2.988917  |
| O | 3.351777  | -2.524372 | -3.395437 |
| O | -1.360375 | -4.191361 | 3.076186  |
| O | 0.924145  | 3.995732  | -3.482712 |
| O | 6.022334  | 4.130455  | 3.402284  |
| O | -7.100104 | -1.692361 | 5.826865  |
| O | 2.935847  | -4.875565 | 7.111338  |
| O | 8.430796  | -0.181619 | 0.114299  |
| O | -2.530045 | 5.766389  | 4.971194  |
| O | -4.735208 | -3.924642 | -2.615352 |
| O | 5.737229  | -2.252758 | -1.081483 |
| O | -0.982683 | 6.070353  | -1.701358 |
| O | 4.733511  | 1.559018  | 5.089027  |
| O | -5.169742 | -1.754647 | -5.495552 |
| O | -5.223612 | 3.695250  | 3.775413  |
| O | 4.788381  | -3.890871 | -4.181933 |
| O | -2.031025 | -6.064110 | 3.844517  |
| O | 1.595786  | 5.869489  | -4.251012 |



|   |           |           |           |
|---|-----------|-----------|-----------|
| O | 4.299973  | 3.728996  | 2.209832  |
| O | -7.711734 | -0.600608 | 4.067797  |
| O | 2.717266  | -6.060462 | 5.318577  |
| O | 6.894122  | -0.469283 | 1.601584  |
| O | -4.067729 | 5.478667  | 6.460474  |
| O | 7.275504  | 0.404978  | -4.474323 |
| N | -7.792949 | -1.634437 | 4.770409  |
| N | 3.465530  | -5.570224 | 6.197154  |
| N | 7.872378  | -0.929178 | 0.967757  |
| N | -3.088467 | 5.018805  | 5.825652  |
| N | 7.357715  | 1.439841  | -5.177903 |
| O | -8.504434 | -2.564015 | 4.425064  |
| O | 4.673297  | -5.745930 | 6.149910  |
| O | 8.279535  | -2.056812 | 1.191348  |
| O | -2.680303 | 3.890180  | 6.049223  |
| O | 8.070203  | 2.368402  | -4.831579 |
| H | 2.758675  | 1.066244  | 1.887286  |
| H | -3.193919 | -1.260891 | -2.292781 |
| H | -3.108365 | 2.029120  | 1.101189  |
| H | 2.672135  | -2.224749 | -1.507714 |
| H | -0.974311 | -3.573994 | 1.183191  |
| H | 0.539072  | 3.379373  | -1.589686 |
| H | 4.643955  | -0.430955 | -1.055932 |
| H | -5.080194 | 0.236325  | 0.649431  |
| H | -2.021825 | 4.219719  | -1.810659 |
| H | 1.585595  | -4.415349 | 1.404134  |
| H | -2.649396 | -3.908243 | -2.214051 |
| H | 2.214157  | 3.713622  | 1.807557  |
| H | 1.552901  | 0.617509  | -1.573461 |
| H | -1.988140 | -0.812131 | 1.166966  |
| H | -1.331247 | 0.992260  | -1.963959 |
| H | 0.896013  | -1.186856 | 1.556464  |
| H | -0.197072 | -1.714534 | -1.909705 |
| H | -0.239153 | 1.518930  | 1.502180  |
| H | 3.020991  | 3.500946  | -1.180675 |
| H | -3.457235 | -3.695602 | 0.775175  |
| H | -4.564184 | 0.851713  | -2.347313 |
| H | 4.129940  | -1.046351 | 1.941823  |
| H | 1.537661  | -4.466264 | -1.698442 |
| H | -1.972883 | 4.269643  | 1.291896  |
| O | -4.435941 | 5.317228  | -3.131726 |
| O | -5.119816 | 4.148302  | -0.612037 |
| O | -6.291206 | 2.993856  | -3.055154 |
| O | -2.127186 | -6.627057 | -3.271628 |
| O | -1.415229 | -6.478013 | -0.505255 |
| O | 0.701298  | -7.070829 | -2.465028 |
| O | 6.664865  | 1.497739  | -6.233360 |
| H | -3.998868 | 2.080386  | -4.856095 |
| H | -3.084163 | 3.468286  | -4.884210 |

|    |           |           |           |
|----|-----------|-----------|-----------|
| H  | -6.648587 | 2.104834  | -3.106548 |
| H  | -6.838164 | 3.745616  | -3.295999 |
| H  | -5.157810 | 5.556064  | -3.717589 |
| H  | -3.789779 | 5.978315  | -2.871551 |
| H  | -5.818496 | 3.683499  | -0.147264 |
| H  | -4.800567 | 4.991883  | -0.279897 |
| H  | -1.903890 | -7.297699 | -0.612587 |
| H  | -1.256862 | -6.124798 | 0.373808  |
| H  | 0.367273  | -7.963113 | -2.577404 |
| H  | 1.647957  | -6.909035 | -2.456045 |
| H  | -2.317426 | -7.518578 | -2.971106 |
| H  | -2.586077 | -6.269495 | -4.034185 |
| H  | -0.351402 | -5.367641 | -4.972121 |
| H  | 0.403161  | -4.024634 | -4.346981 |
| H  | -5.484733 | -3.038241 | 3.376257  |
| H  | -4.663265 | -1.595040 | 3.306049  |
| H  | -8.147416 | -2.098357 | 1.283656  |
| H  | -7.513228 | -0.580500 | 1.521478  |
| H  | -6.942214 | -4.509652 | 0.318425  |
| H  | -5.906379 | -4.819004 | 1.581346  |
| H  | -6.802012 | -2.958588 | -1.552163 |
| H  | -6.108772 | -1.474172 | -1.831057 |
| H  | 2.151838  | 6.074881  | 3.627696  |
| H  | 1.883197  | 7.324016  | 2.562617  |
| H  | -2.082187 | 6.713422  | 2.049530  |
| H  | -0.804512 | 7.768475  | 2.170899  |
| H  | -0.839400 | 3.830004  | 3.940481  |
| H  | -0.084832 | 5.173037  | 4.564622  |
| H  | 0.821626  | 5.929152  | -0.779329 |
| H  | 1.468659  | 7.102078  | 0.206067  |
| H  | 5.671542  | 1.278534  | 1.424526  |
| H  | 6.365777  | 2.762934  | 1.146637  |
| H  | 5.468130  | 4.624307  | -1.985857 |
| H  | 6.506989  | 4.314056  | -0.725945 |
| H  | 7.077998  | 0.384879  | -1.927998 |
| H  | 7.712177  | 1.903736  | -1.690151 |
| H  | 4.228040  | 1.399445  | -3.713569 |
| H  | 5.049503  | 2.842620  | -3.782777 |
| H  | 6.401920  | -3.940271 | 2.890498  |
| H  | 6.212343  | -2.299489 | 2.701047  |
| H  | 4.367314  | -5.185514 | -0.125562 |
| H  | 5.384238  | -3.877163 | -0.257201 |
| H  | 3.354548  | -6.173937 | 2.465031  |
| H  | 4.723584  | -5.751652 | 3.310074  |
| H  | 2.647938  | -3.663890 | 4.476685  |
| H  | 3.563637  | -2.276007 | 4.449575  |
| Ga | -0.672575 | -5.430587 | -2.236457 |
| Ga | 3.829943  | -3.498071 | 1.994150  |
| Ga | 5.011055  | 2.035380  | -1.149556 |

Ga 0.237345 5.234966 1.829937

XYZ of Ga<sub>11</sub>In<sub>2</sub>m

193

|    |           |           |           |
|----|-----------|-----------|-----------|
| In | -5.647425 | -1.870839 | 0.688736  |
| In | 0.489948  | 5.254372  | 1.570885  |
| Ga | -0.281136 | -0.115230 | -0.258544 |
| Ga | 2.759958  | -0.723903 | 0.152260  |
| Ga | -3.323229 | 0.493499  | -0.669368 |
| Ga | -1.261591 | 2.844742  | -0.511017 |
| Ga | 0.698300  | -3.075130 | -0.005091 |
| Ga | -2.310678 | -2.469107 | -0.619280 |
| Ga | 1.748350  | 2.237649  | 0.102206  |
| O  | 4.225075  | -0.230472 | -0.969458 |
| O  | -4.787348 | 0.000012  | 0.452371  |
| O  | -2.119924 | 3.682061  | -1.998245 |
| O  | 1.556653  | -3.912465 | 1.481138  |
| O  | -2.304216 | -3.841405 | -1.948746 |
| O  | 1.741832  | 3.608949  | 1.431687  |
| O  | 3.315286  | 2.663052  | -0.894417 |
| O  | -3.877615 | -2.894510 | 0.377344  |
| O  | -4.197019 | 1.470379  | -2.051988 |
| O  | 3.633728  | -1.700768 | 1.535880  |
| O  | 0.569929  | -4.515802 | -1.247172 |
| O  | -1.133276 | 4.284415  | 0.731078  |
| O  | 6.990020  | 0.767064  | -1.685865 |
| O  | -7.553271 | -0.997483 | 1.167757  |
| O  | 3.540597  | -5.667348 | 2.944650  |
| O  | 2.005993  | 6.395963  | 2.580012  |
| O  | 6.013307  | 3.565564  | -1.439659 |
| O  | -6.576654 | -3.796951 | 0.923564  |
| O  | 5.541584  | -3.472126 | 2.808070  |
| O  | -0.778227 | 6.986908  | 1.714440  |
| O  | 1.463511  | 0.400216  | -0.984917 |
| O  | -2.024897 | -0.632728 | 0.467879  |
| O  | -1.374601 | 1.006043  | -1.433655 |
| O  | 0.813271  | -1.237556 | 0.916603  |
| O  | -0.478142 | -1.784152 | -1.265453 |
| O  | -0.084111 | 1.553677  | 0.747366  |
| O  | 2.731772  | 0.942657  | 1.094710  |
| O  | -3.294101 | -1.174114 | -1.611783 |
| O  | -2.886054 | 2.127146  | 0.206809  |
| O  | 2.322747  | -2.358563 | -0.724902 |
| O  | -1.097630 | -3.389889 | 0.543163  |
| O  | 0.536300  | 3.158376  | -1.060215 |
| O  | 5.881924  | 1.655145  | 0.797415  |
| O  | -6.444217 | -1.885589 | -1.313502 |
| O  | 4.332316  | -4.646593 | 0.394101  |
| O  | 1.321196  | 6.181886  | -0.188216 |

|   |           |           |           |
|---|-----------|-----------|-----------|
| O | 4.814898  | 1.643542  | -3.334908 |
| O | -5.377227 | -1.874999 | 2.817835  |
| O | -3.483165 | 2.896599  | -4.641248 |
| O | 2.919858  | -3.128016 | 4.123155  |
| O | -0.418191 | -5.003356 | -4.081300 |
| O | -0.145060 | 4.772937  | 3.563192  |
| O | -4.886821 | -5.137385 | -4.208118 |
| O | 7.032402  | -2.121852 | -2.382409 |
| O | -1.490965 | 6.812833  | -3.803810 |
| O | 4.814985  | 0.035797  | 3.423600  |
| O | -5.377257 | -0.266257 | -3.940687 |
| O | -3.584914 | 4.704457  | 2.066398  |
| O | 3.022586  | -4.935915 | -2.583471 |
| O | -3.392018 | -4.998479 | 2.197486  |
| O | 2.829690  | 4.767022  | -2.714559 |
| O | 4.324472  | 4.905943  | 3.692045  |
| N | -5.542941 | -4.327068 | -3.537243 |
| N | 6.494873  | -2.987409 | -1.675739 |
| N | -0.653946 | 6.892119  | -2.893093 |
| N | 4.157830  | 0.845156  | 4.093469  |
| N | -4.721137 | -1.076574 | -4.611562 |
| N | -4.122423 | 3.838886  | 2.772068  |
| N | 3.559172  | -4.069305 | -3.290175 |
| N | -2.554000 | -4.919249 | 3.108224  |
| N | 1.992670  | 4.687736  | -3.625276 |
| N | 4.979594  | 4.095681  | 3.021149  |
| O | -6.733875 | -4.076890 | -3.792788 |
| O | 6.889095  | -4.166227 | -1.669017 |
| O | 0.172692  | 7.817327  | -2.840684 |
| O | 2.967930  | 1.096293  | 3.838930  |
| O | -3.531181 | -1.326712 | -4.357038 |
| O | -3.728221 | 2.660083  | 2.779790  |
| O | 3.165893  | -2.891541 | -3.296863 |
| O | -1.728305 | -3.992987 | 3.160597  |
| O | 1.164979  | 3.761585  | -3.677691 |
| O | 6.170604  | 3.846486  | 3.275680  |
| O | -7.330543 | -1.023990 | 5.721010  |
| O | 2.461637  | -4.787806 | 7.286219  |
| O | 8.338951  | -0.739133 | 0.197386  |
| O | -2.278346 | 6.087162  | 4.645193  |
| O | -5.004065 | -3.739807 | -2.589146 |
| O | 5.533369  | -2.680255 | -0.958285 |
| O | -0.627318 | 6.023615  | -2.009110 |
| O | 4.696706  | 1.432418  | 5.041565  |
| O | -5.260033 | -1.663820 | -5.558659 |
| O | -5.083927 | 4.146040  | 3.489523  |
| O | 4.521598  | -4.377498 | -4.006596 |
| O | -2.528295 | -5.786714 | 3.991172  |
| O | 1.966023  | 5.556255  | -4.508259 |

|   |           |           |           |
|---|-----------|-----------|-----------|
| O | 4.441717  | 3.508365  | 2.073073  |
| O | -7.847422 | 0.033137  | 3.911132  |
| O | 2.190634  | -6.027306 | 5.538092  |
| O | 6.767575  | -0.868106 | 1.670573  |
| O | -3.850759 | 5.958275  | 6.120358  |
| O | 7.284096  | -0.264539 | -4.428226 |
| N | -8.004312 | -0.964360 | 4.652380  |
| N | 2.957368  | -5.551016 | 6.408377  |
| N | 7.722370  | -1.414631 | 1.070653  |
| N | -2.894946 | 5.411679  | 5.519460  |
| N | 7.442059  | 0.733886  | -5.170467 |
| O | -8.769656 | -1.859688 | 4.332653  |
| O | 4.151811  | -5.805286 | 6.386967  |
| O | 8.053022  | -2.556092 | 1.344629  |
| O | -2.563351 | 4.269164  | 5.793470  |
| O | 8.208326  | 1.628175  | -4.849705 |
| H | 2.736329  | 0.938738  | 1.831090  |
| H | -3.298622 | -1.169182 | -2.347177 |
| H | -3.045631 | 2.242188  | 0.916114  |
| H | 2.482305  | -2.473590 | -1.433207 |
| H | -1.278477 | -3.478016 | 1.251127  |
| H | 0.716204  | 3.247556  | -1.768214 |
| H | 4.559571  | -0.792765 | -1.021295 |
| H | -5.122842 | 0.562361  | 0.504188  |
| H | -1.782078 | 4.240264  | -2.062020 |
| H | 1.218751  | -4.471666 | 1.544926  |
| H | -2.926971 | -3.840620 | -2.156200 |
| H | 2.364698  | 3.610161  | 1.639113  |
| H | 1.549582  | 0.429440  | -1.627851 |
| H | -2.111854 | -0.659899 | 1.110764  |
| H | -1.299045 | 0.971729  | -2.077834 |
| H | 0.736792  | -1.202204 | 1.559747  |
| H | -0.342530 | -1.797638 | -1.899751 |
| H | -0.220777 | 1.566220  | 1.381658  |
| H | 3.195226  | 3.226619  | -1.325489 |
| H | -3.758517 | -3.457008 | 0.809380  |
| H | -4.529016 | 1.022762  | -2.505937 |
| H | 3.967722  | -1.253262 | 1.989870  |
| H | 1.208289  | -4.643884 | -1.553638 |
| H | -1.770673 | 4.411428  | 1.036579  |
| O | -4.102905 | 5.435875  | -3.462723 |
| O | -4.893666 | 4.415095  | -0.910154 |
| O | -6.104931 | 3.240739  | -3.324165 |
| O | -2.567303 | -6.627491 | -3.098064 |
| O | -1.883525 | -6.413344 | -0.328857 |
| O | 0.215878  | -7.218351 | -2.230513 |
| O | 6.768271  | 0.793531  | -6.238097 |
| H | -3.852849 | 2.111133  | -5.051807 |
| H | -2.850287 | 3.435504  | -5.119996 |

|    |           |           |           |
|----|-----------|-----------|-----------|
| H  | -6.518175 | 2.375022  | -3.346250 |
| H  | -6.599087 | 4.015638  | -3.602830 |
| H  | -4.800138 | 5.696642  | -4.068726 |
| H  | -3.418935 | 6.064234  | -3.218587 |
| H  | -5.626885 | 4.014909  | -0.438507 |
| H  | -4.525079 | 5.249203  | -0.606388 |
| H  | -2.422562 | -7.203779 | -0.411604 |
| H  | -1.714249 | -6.035977 | 0.538053  |
| H  | -0.173472 | -8.091259 | -2.313033 |
| H  | 1.170798  | -7.117143 | -2.213065 |
| H  | -2.818541 | -7.492256 | -2.765833 |
| H  | -2.992159 | -6.272231 | -3.881142 |
| H  | -0.691899 | -5.553370 | -4.818625 |
| H  | 0.139416  | -4.237315 | -4.234888 |
| H  | -5.773326 | -2.567592 | 3.350637  |
| H  | -4.859682 | -1.183809 | 3.236765  |
| H  | -8.342235 | -1.544237 | 1.181377  |
| H  | -7.614689 | -0.061683 | 1.369402  |
| H  | -7.282441 | -4.064399 | 0.330409  |
| H  | -6.285338 | -4.388370 | 1.620545  |
| H  | -7.018045 | -2.601784 | -1.597129 |
| H  | -6.226960 | -1.177085 | -1.923124 |
| H  | 2.430885  | 6.041716  | 3.364076  |
| H  | 2.257306  | 7.261711  | 2.246767  |
| H  | -1.732129 | 6.885630  | 1.696012  |
| H  | -0.390797 | 7.860910  | 1.795905  |
| H  | -0.702687 | 4.006911  | 3.717780  |
| H  | 0.128648  | 5.322951  | 4.300518  |
| H  | 1.151901  | 5.804534  | -1.054126 |
| H  | 1.860234  | 6.972321  | -0.105470 |
| H  | 5.662635  | 0.945738  | 1.406010  |
| H  | 6.454699  | 2.370397  | 1.081035  |
| H  | 5.720031  | 4.158107  | -2.135695 |
| H  | 6.720132  | 3.832926  | -0.848482 |
| H  | 7.052360  | -0.169774 | -1.886475 |
| H  | 7.779962  | 1.313778  | -1.698464 |
| H  | 4.297373  | 0.952336  | -3.754838 |
| H  | 5.210997  | 2.336134  | -3.867710 |
| H  | 6.035796  | -4.246026 | 3.086721  |
| H  | 5.954884  | -2.605411 | 2.830142  |
| H  | 3.964839  | -5.478759 | 0.090328  |
| H  | 5.065627  | -4.244395 | -0.076574 |
| H  | 2.856607  | -6.295691 | 2.701514  |
| H  | 4.238828  | -5.928170 | 3.550674  |
| H  | 2.286980  | -3.666922 | 4.601903  |
| H  | 3.290520  | -2.342590 | 4.534734  |
| Ga | -1.052276 | -5.485830 | -2.087959 |
| Ga | 3.509640  | -3.676725 | 2.133580  |
| Ga | 5.086094  | 1.639326  | -1.205788 |

Ga -4.071949 3.445252 -2.651652



XYZ of Ga<sub>11</sub>In<sub>2</sub>P

193

|    |           |           |           |
|----|-----------|-----------|-----------|
| In | 5.071626  | 1.605111  | -1.081065 |
| In | -5.752993 | -1.715366 | 0.628023  |
| Ga | -0.341143 | -0.054590 | -0.226530 |
| Ga | 2.681976  | -0.738913 | 0.197679  |
| Ga | -3.365259 | 0.629809  | -0.650768 |
| Ga | -1.255183 | 2.931202  | -0.416373 |
| Ga | 0.571871  | -3.040314 | -0.035717 |
| Ga | -2.417201 | -2.354456 | -0.663008 |
| Ga | 1.734837  | 2.244278  | 0.209937  |
| O  | 4.168311  | -0.250662 | -0.898091 |
| O  | -4.850598 | 0.141481  | 0.445031  |
| O  | -2.080662 | 3.822440  | -1.890810 |
| O  | 1.397379  | -3.931544 | 1.437721  |
| O  | -2.427198 | -3.694262 | -2.025192 |
| O  | 1.744757  | 3.583087  | 1.572110  |
| O  | 3.320272  | 2.659319  | -0.761481 |
| O  | -4.002636 | -2.769497 | 0.308409  |
| O  | -4.204216 | 1.658360  | -2.017397 |
| O  | 3.520904  | -1.767472 | 1.565307  |
| O  | 0.424749  | -4.447624 | -1.313455 |
| O  | -1.108138 | 4.337515  | 0.861354  |
| O  | 6.960973  | 0.703443  | -1.564393 |
| O  | -7.644227 | -0.812538 | 1.110305  |
| O  | 3.328653  | -5.763763 | 2.876703  |
| O  | 2.057509  | 6.335332  | 2.789982  |
| O  | 6.042304  | 3.515796  | -1.259598 |
| O  | -6.725694 | -3.625905 | 0.807498  |
| O  | 5.377635  | -3.609911 | 2.811925  |
| O  | -0.704722 | 7.007268  | 1.913117  |
| O  | 1.421236  | 0.440096  | -0.923956 |
| O  | -2.102680 | -0.551349 | 0.470902  |
| O  | -1.398647 | 1.118071  | -1.384268 |
| O  | 0.717279  | -1.228327 | 0.931225  |
| O  | -0.564099 | -1.694184 | -1.275339 |
| O  | -0.118158 | 1.585012  | 0.821279  |
| O  | 2.680386  | 0.904763  | 1.179898  |
| O  | -3.362749 | -1.014941 | -1.632969 |
| O  | -2.901675 | 2.232064  | 0.268732  |
| O  | 2.218344  | -2.342156 | -0.722831 |
| O  | -1.235712 | -3.329028 | 0.488031  |
| O  | 0.554345  | 3.218772  | -0.941073 |
| O  | 5.847901  | 1.555536  | 0.929248  |
| O  | -6.530216 | -1.664725 | -1.381309 |
| O  | 4.167153  | -4.699530 | 0.359087  |
| O  | 1.395485  | 6.202703  | 0.011134  |

|   |           |           |           |
|---|-----------|-----------|-----------|
| O | 4.821506  | 1.666327  | -3.211889 |
| O | -5.503869 | -1.776505 | 2.758817  |
| O | -3.434459 | 3.130468  | -4.564618 |
| O | 2.751128  | -3.240560 | 4.110518  |
| O | -0.545748 | -4.845411 | -4.167622 |
| O | -0.137505 | 4.736316  | 3.713533  |
| O | -5.014766 | -4.879187 | -4.339198 |
| O | 6.948051  | -2.168160 | -2.330253 |
| O | -1.366813 | 6.981239  | -3.614119 |
| O | 4.720640  | -0.102809 | 3.505421  |
| O | -5.402927 | -0.006372 | -3.958482 |
| O | -3.563171 | 4.778577  | 2.183596  |
| O | 2.880808  | -4.888755 | -2.636667 |
| O | -3.580301 | -4.926610 | 2.081515  |
| O | 2.897938  | 4.816432  | -2.534586 |
| O | 4.332373  | 4.769001  | 3.887126  |
| N | -5.659863 | -4.071137 | -3.655031 |
| N | 6.385117  | -3.038541 | -1.649776 |
| N | -0.537266 | 7.020427  | -2.694005 |
| N | 4.074498  | 0.704331  | 4.188549  |
| N | -4.757829 | -0.814423 | -4.642649 |
| N | -4.126076 | 3.908205  | 2.863074  |
| N | 3.442823  | -4.017300 | -3.317163 |
| N | -2.749758 | -4.887500 | 3.001658  |
| N | 2.068391  | 4.777244  | -3.454701 |
| N | 4.976474  | 3.961028  | 3.202930  |
| O | -6.842574 | -3.789067 | -3.915508 |
| O | 6.753809  | -4.225471 | -1.667930 |
| O | 0.308525  | 7.925922  | -2.611527 |
| O | 2.892832  | 0.987311  | 3.929111  |
| O | -3.576085 | -1.096406 | -4.383200 |
| O | -3.757413 | 2.721266  | 2.845919  |
| O | 3.075050  | -2.831444 | -3.298990 |
| O | -1.904886 | -3.980930 | 3.084118  |
| O | 1.221526  | 3.870830  | -3.537218 |
| O | 6.159291  | 3.679964  | 3.462418  |
| O | -7.466848 | -0.953170 | 5.663455  |
| O | 2.226273  | -4.965445 | 7.228072  |
| O | 8.258638  | -0.876493 | 0.294301  |
| O | -2.252555 | 6.070252  | 4.807150  |
| O | -5.117819 | -3.518656 | -2.688024 |
| O | 5.423442  | -2.727868 | -0.934067 |
| O | -0.538006 | 6.130581  | -1.831099 |
| O | 4.616543  | 1.256812  | 5.155556  |
| O | -5.299903 | -1.366912 | -5.608656 |
| O | -5.087751 | 4.218877  | 3.578782  |
| O | 4.405387  | -4.329055 | -4.031854 |
| O | -2.751388 | -5.776263 | 3.863546  |
| O | 2.069102  | 5.667082  | -4.316606 |

|   |           |           |           |
|---|-----------|-----------|-----------|
| O | 4.435426  | 3.408469  | 2.235952  |
| O | -7.943072 | 0.158083  | 3.874974  |
| O | 1.945855  | -6.156441 | 5.448004  |
| O | 6.670460  | -1.006603 | 1.749257  |
| O | -3.841788 | 5.940203  | 6.264077  |
| O | 7.259712  | -0.268183 | -4.328074 |
| N | -8.128651 | -0.853273 | 4.590363  |
| N | 2.714073  | -5.717958 | 6.336657  |
| N | 7.619125  | -1.559196 | 1.145186  |
| N | -2.892097 | 5.387541  | 5.659035  |
| N | 7.446394  | 0.744101  | -5.044423 |
| O | -8.909898 | -1.723819 | 4.241949  |
| O | 3.902923  | -5.997546 | 6.320206  |
| O | 7.922445  | -2.713823 | 1.394508  |
| O | -2.587859 | 4.231840  | 5.908376  |
| O | 8.228531  | 1.613564  | -4.694992 |
| H | 2.677625  | 0.883071  | 1.915978  |
| H | -3.359941 | -0.992260 | -2.368039 |
| H | -3.065699 | 2.333488  | 0.979099  |
| H | 2.382339  | -2.443589 | -1.432199 |
| H | -1.425356 | -3.430171 | 1.191941  |
| H | 0.743069  | 3.320990  | -1.645002 |
| H | 4.491130  | -0.818688 | -0.960414 |
| H | -5.174413 | 0.709585  | 0.507325  |
| H | -1.730278 | 4.374537  | -1.937906 |
| H | 1.046918  | -4.484638 | 1.484806  |
| H | -3.047725 | -3.674960 | -2.238349 |
| H | 2.365439  | 3.565779  | 1.785288  |
| H | 1.514225  | 0.482866  | -1.565165 |
| H | -2.196511 | -0.592047 | 1.112105  |
| H | -1.317522 | 1.097597  | -2.028358 |
| H | 0.635265  | -1.206769 | 1.574298  |
| H | -0.422586 | -1.695386 | -1.908490 |
| H | -0.260745 | 1.585294  | 1.454390  |
| H | 3.216600  | 3.235548  | -1.179879 |
| H | -3.899912 | -3.344659 | 0.727789  |
| H | -4.541289 | 1.229092  | -2.485118 |
| H | 3.859970  | -1.338358 | 2.033085  |
| H | 1.063185  | -4.582159 | -1.616982 |
| H | -1.745626 | 4.470984  | 1.163900  |
| O | -4.010987 | 5.653594  | -3.330774 |
| O | -4.848549 | 4.589266  | -0.811131 |
| O | -6.061025 | 3.499803  | -3.264026 |
| O | -2.738847 | -6.445579 | -3.244024 |
| O | -2.077849 | -6.312881 | -0.464205 |
| O | 0.022329  | -7.117454 | -2.365189 |
| O | 6.784562  | 0.843989  | -6.116515 |
| H | -3.816901 | 2.363305  | -4.997493 |
| H | -2.785466 | 3.666825  | -5.024272 |

|    |           |           |           |
|----|-----------|-----------|-----------|
| H  | -6.492556 | 2.644054  | -3.310906 |
| H  | -6.535640 | 4.291726  | -3.528431 |
| H  | -4.696465 | 5.943927  | -3.936743 |
| H  | -3.316091 | 6.260895  | -3.065146 |
| H  | -5.594802 | 4.193907  | -0.356150 |
| H  | -4.465109 | 5.407632  | -0.483845 |
| H  | -2.632923 | -7.089198 | -0.571074 |
| H  | -1.909018 | -5.960201 | 0.413123  |
| H  | -0.384876 | -7.979460 | -2.472436 |
| H  | 0.978988  | -7.037476 | -2.336416 |
| H  | -3.011875 | -7.312404 | -2.935178 |
| H  | -3.148253 | -6.062472 | -4.022189 |
| H  | -0.823968 | -5.371488 | -4.920561 |
| H  | 0.029687  | -4.088206 | -4.297426 |
| H  | -5.919986 | -2.472914 | 3.270988  |
| H  | -4.975718 | -1.106984 | 3.199154  |
| H  | -8.444864 | -1.342182 | 1.103345  |
| H  | -7.687481 | 0.119266  | 1.333967  |
| H  | -7.431211 | -3.863632 | 0.201504  |
| H  | -6.454024 | -4.240077 | 1.492634  |
| H  | -7.116502 | -2.361263 | -1.687516 |
| H  | -6.291795 | -0.946682 | -1.971552 |
| H  | 2.466963  | 5.953214  | 3.569157  |
| H  | 2.330644  | 7.203162  | 2.480147  |
| H  | -1.660355 | 6.927221  | 1.883373  |
| H  | -0.299403 | 7.870434  | 2.019318  |
| H  | -0.712970 | 3.979103  | 3.844337  |
| H  | 0.140714  | 5.262393  | 4.466472  |
| H  | 1.226625  | 5.850015  | -0.865195 |
| H  | 1.950560  | 6.979020  | 0.118003  |
| H  | 5.607439  | 0.836659  | 1.518423  |
| H  | 6.433113  | 2.251154  | 1.235416  |
| H  | 5.768690  | 4.131112  | -1.943782 |
| H  | 6.748876  | 3.753463  | -0.655575 |
| H  | 7.005118  | -0.229444 | -1.787038 |
| H  | 7.762577  | 1.233001  | -1.556406 |
| H  | 4.293383  | 0.996815  | -3.653225 |
| H  | 5.237622  | 2.362736  | -3.724060 |
| H  | 5.852328  | -4.400838 | 3.076341  |
| H  | 5.809243  | -2.753166 | 2.858817  |
| H  | 3.784863  | -5.515980 | 0.031852  |
| H  | 4.913531  | -4.302186 | -0.094872 |
| H  | 2.633727  | -6.371072 | 2.612074  |
| H  | 4.015127  | -6.054174 | 3.482701  |
| H  | 2.102135  | -3.776917 | 4.570172  |
| H  | 3.134537  | -2.473483 | 4.544422  |
| Ga | -1.209609 | -5.361697 | -2.192529 |
| Ga | 3.348483  | -3.754042 | 2.113812  |
| Ga | 0.527245  | 5.251519  | 1.739458  |

Ga -4.030817 3.643873 -2.567883

XYZ of Ga<sub>12</sub>In<sub>1</sub>

193

|    |           |           |           |
|----|-----------|-----------|-----------|
| In | -5.623284 | -1.870232 | 0.667283  |
| Ga | -0.273861 | -0.042794 | -0.238644 |
| Ga | 2.772749  | -0.629080 | 0.163765  |
| Ga | -3.321471 | 0.543538  | -0.641074 |
| Ga | -1.283614 | 2.911653  | -0.433849 |
| Ga | 0.734872  | -2.997200 | -0.042460 |
| Ga | -2.279390 | -2.409227 | -0.648227 |
| Ga | 1.731621  | 2.322640  | 0.170933  |
| O  | 4.233999  | -0.099000 | -0.946217 |
| O  | -4.781722 | 0.013412  | 0.468928  |
| O  | -2.148764 | 3.769566  | -1.905307 |
| O  | 1.600043  | -3.855109 | 1.427998  |
| O  | -2.257849 | -3.754875 | -2.004506 |
| O  | 1.710035  | 3.667289  | 1.527207  |
| O  | 3.295239  | 2.783255  | -0.815196 |
| O  | -3.843008 | -2.869842 | 0.337903  |
| O  | -4.203579 | 1.538758  | -2.005208 |
| O  | 3.654836  | -1.624305 | 1.528899  |
| O  | 0.622182  | -4.414276 | -1.312884 |
| O  | -1.170970 | 4.327730  | 0.836569  |
| O  | 6.989556  | 0.940030  | -1.639437 |
| O  | -7.538257 | -1.025568 | 1.161129  |
| O  | 3.599948  | -5.618659 | 2.859006  |
| O  | 1.945138  | 6.433583  | 2.730625  |
| O  | 5.984652  | 3.723236  | -1.339242 |
| O  | -6.533440 | -3.809782 | 0.862927  |
| O  | 5.579017  | -3.401308 | 2.768205  |
| O  | -0.843970 | 7.013689  | 1.873500  |
| O  | 1.466282  | 0.504279  | -0.952583 |
| O  | -2.013098 | -0.591911 | 0.475304  |
| O  | -1.377289 | 1.090494  | -1.392728 |
| O  | 0.830520  | -1.177127 | 0.915455  |
| O  | -0.453139 | -1.693392 | -1.278530 |
| O  | -0.094563 | 1.607809  | 0.800242  |
| O  | 2.726936  | 1.018182  | 1.138883  |
| O  | -3.274705 | -1.104769 | -1.616177 |
| O  | -2.901549 | 2.163848  | 0.267701  |
| O  | 2.352803  | -2.250384 | -0.746016 |
| O  | -1.058378 | -3.340630 | 0.497292  |
| O  | 0.511608  | 3.253997  | -0.974565 |
| O  | 5.870106  | 1.767804  | 0.859535  |
| O  | -6.417850 | -1.853397 | -1.335823 |
| O  | 4.384015  | -4.539893 | 0.330061  |
| O  | 1.265336  | 6.267383  | -0.042118 |
| O  | 4.807457  | 1.827146  | -3.273506 |

|   |           |           |           |
|---|-----------|-----------|-----------|
| O | -5.355226 | -1.913733 | 2.796212  |
| O | -3.501389 | 3.022877  | -4.564950 |
| O | 2.952643  | -3.109414 | 4.086636  |
| O | -0.358127 | -4.855613 | -4.157280 |
| O | -0.190574 | 4.770075  | 3.678971  |
| O | -4.825061 | -5.031701 | -4.292150 |
| O | 7.061540  | -1.934003 | -2.392803 |
| O | -1.549313 | 6.941500  | -3.647972 |
| O | 4.816742  | 0.086351  | 3.451954  |
| O | -5.364465 | -0.171939 | -3.929242 |
| O | -3.628046 | 4.696837  | 2.176937  |
| O | 3.080277  | -4.783424 | -2.654230 |
| O | -3.338246 | -5.004388 | 2.116760  |
| O | 2.790477  | 4.917801  | -2.594054 |
| O | 4.277271  | 4.945109  | 3.815856  |
| N | -5.489935 | -4.241377 | -3.606213 |
| N | 6.531976  | -2.818665 | -1.704005 |
| N | -0.714056 | 7.011137  | -2.734851 |
| N | 4.150844  | 0.875727  | 4.136865  |
| N | -4.699590 | -0.962264 | -4.615179 |
| N | -4.157589 | 3.812179  | 2.864735  |
| N | 3.608888  | -3.897717 | -3.343043 |
| N | -2.501990 | -4.934796 | 3.029902  |
| N | 1.955220  | 4.848163  | -3.507175 |
| N | 4.941147  | 4.154831  | 3.129898  |
| O | -6.683052 | -3.998099 | -3.858218 |
| O | 6.937961  | -3.993393 | -1.720067 |
| O | 0.103233  | 7.943334  | -2.663191 |
| O | 2.958751  | 1.119953  | 3.885886  |
| O | -3.507452 | -1.205491 | -4.364194 |
| O | -3.751624 | 2.637447  | 2.849672  |
| O | 3.203855  | -2.724034 | -3.326966 |
| O | -1.685654 | -4.001555 | 3.101547  |
| O | 1.136887  | 3.915014  | -3.578862 |
| O | 6.134330  | 3.912557  | 3.380910  |
| O | -7.319912 | -1.139749 | 5.713238  |
| O | 2.507825  | -4.835824 | 7.215771  |
| O | 8.351566  | -0.589520 | 0.215362  |
| O | -2.337999 | 6.041325  | 4.784102  |
| O | -4.957926 | -3.667601 | -2.646058 |
| O | 5.566718  | -2.535347 | -0.981798 |
| O | -0.679643 | 6.125658  | -1.868148 |
| O | 4.682853  | 1.449503  | 5.097020  |
| O | -5.231621 | -1.536044 | -5.574335 |
| O | -5.122846 | 4.095497  | 3.586942  |
| O | 4.575078  | -4.182084 | -4.064236 |
| O | -2.468509 | -5.819226 | 3.895590  |
| O | 1.920786  | 5.733638  | -4.372878 |
| O | 4.410136  | 3.581009  | 2.169764  |

|   |           |           |           |
|---|-----------|-----------|-----------|
| O | -7.845495 | -0.052303 | 3.923948  |
| O | 2.251012  | -6.043208 | 5.443197  |
| O | 6.780060  | -0.763231 | 1.683806  |
| O | -3.910545 | 5.867650  | 6.254524  |
| O | 7.296727  | -0.034238 | -4.401262 |
| N | -7.993154 | -1.065757 | 4.645175  |
| N | 3.012058  | -5.576567 | 6.323642  |
| N | 7.740883  | -1.288249 | 1.074379  |
| N | -2.948702 | 5.342591  | 5.644119  |
| N | 7.445453  | 0.980174  | -5.123463 |
| O | -8.749180 | -1.962191 | 4.306913  |
| O | 4.209006  | -5.818432 | 6.298671  |
| O | 8.082657  | -2.431540 | 1.326178  |
| O | -2.605976 | 4.198255  | 5.895933  |
| O | 8.202410  | 1.875558  | -4.784186 |
| H | 2.730782  | 0.999770  | 1.875047  |
| H | -3.278526 | -1.085363 | -2.351336 |
| H | -3.062991 | 2.263264  | 0.978944  |
| H | 2.514224  | -2.349806 | -1.456258 |
| H | -1.239055 | -3.444518 | 1.203159  |
| H | 0.691332  | 3.358930  | -1.680447 |
| H | 4.574155  | -0.656794 | -1.008733 |
| H | -5.122876 | 0.571252  | 0.531424  |
| H | -1.816453 | 4.332264  | -1.957643 |
| H | 1.267686  | -4.418805 | 1.480328  |
| H | -2.880369 | -3.756209 | -2.212661 |
| H | 2.332647  | 3.670621  | 1.735373  |
| H | 1.552711  | 0.547049  | -1.594710 |
| H | -2.100434 | -0.632637 | 1.117422  |
| H | -1.300737 | 1.069662  | -2.037367 |
| H | 0.753035  | -1.155245 | 1.559079  |
| H | -0.316754 | -1.692998 | -1.912806 |
| H | -0.231993 | 1.606461  | 1.434491  |
| H | 3.169987  | 3.353996  | -1.235208 |
| H | -3.718730 | -3.439543 | 0.758899  |
| H | -4.530620 | 1.096900  | -2.468305 |
| H | 3.983875  | -1.182539 | 1.992037  |
| H | 1.262102  | -4.529905 | -1.621041 |
| H | -1.809916 | 4.442319  | 1.143742  |
| O | -4.147696 | 5.532077  | -3.337299 |
| O | -4.930806 | 4.453255  | -0.806334 |
| O | -6.127806 | 3.314763  | -3.244519 |
| O | -2.491887 | -6.520212 | -3.208898 |
| O | -1.813105 | -6.353970 | -0.435176 |
| O | 0.296180  | -7.100281 | -2.349794 |
| O | 6.772189  | 1.054161  | -6.190527 |
| H | -3.862780 | 2.242020  | -4.991378 |
| H | -2.873446 | 3.577420  | -5.032201 |
| H | -6.532348 | 2.445570  | -3.284186 |



|    |           |           |           |
|----|-----------|-----------|-----------|
| H  | -6.629403 | 4.090042  | -3.508439 |
| H  | -4.846885 | 5.797787  | -3.938886 |
| H  | -3.470293 | 6.162287  | -3.079980 |
| H  | -5.660466 | 4.036538  | -0.343568 |
| H  | -4.570890 | 5.284840  | -0.485720 |
| H  | -2.344125 | -7.147957 | -0.534160 |
| H  | -1.648494 | -5.992123 | 0.439217  |
| H  | -0.084336 | -7.975231 | -2.449997 |
| H  | 1.250022  | -6.989912 | -2.329191 |
| H  | -2.734801 | -7.393832 | -2.894103 |
| H  | -2.919477 | -6.153816 | -3.985330 |
| H  | -0.625568 | -5.393665 | -4.905648 |
| H  | 0.191947  | -4.081162 | -4.295044 |
| H  | -5.744920 | -2.620629 | 3.314761  |
| H  | -4.845047 | -1.225819 | 3.229329  |
| H  | -8.321726 | -1.580331 | 1.162997  |
| H  | -7.609236 | -0.094591 | 1.381126  |
| H  | -7.235913 | -4.072497 | 0.263752  |
| H  | -6.236934 | -4.411912 | 1.548455  |
| H  | -6.984197 | -2.569543 | -1.634226 |
| H  | -6.207070 | -1.130861 | -1.931081 |
| H  | 2.372753  | 6.068182  | 3.508062  |
| H  | 2.188119  | 7.308208  | 2.414836  |
| H  | -1.796792 | 6.903279  | 1.851918  |
| H  | -0.465384 | 7.889735  | 1.972667  |
| H  | -0.740669 | 3.995619  | 3.817735  |
| H  | 0.076868  | 5.308128  | 4.427339  |
| H  | 1.100705  | 5.905531  | -0.915511 |
| H  | 1.796356  | 7.061370  | 0.056866  |
| H  | 5.657303  | 1.044365  | 1.453745  |
| H  | 6.435408  | 2.482997  | 1.157911  |
| H  | 5.686173  | 4.326451  | -2.023806 |
| H  | 6.688165  | 3.985915  | -0.742046 |
| H  | 7.061468  | 0.008004  | -1.858419 |
| H  | 7.774003  | 1.494743  | -1.640285 |
| H  | 4.297299  | 1.139237  | -3.707623 |
| H  | 5.197152  | 2.534042  | -3.792055 |
| H  | 6.080661  | -4.175589 | 3.032130  |
| H  | 5.983605  | -2.531117 | 2.807877  |
| H  | 4.025189  | -5.369525 | 0.009479  |
| H  | 5.113745  | -4.121182 | -0.131694 |
| H  | 2.922525  | -6.248875 | 2.602686  |
| H  | 4.300136  | -5.884415 | 3.460613  |
| H  | 2.324699  | -3.663956 | 4.553886  |
| H  | 3.315012  | -2.328607 | 4.514084  |
| Ga | -0.989384 | -5.383655 | -2.174620 |
| Ga | 3.549909  | -3.612818 | 2.087338  |
| Ga | 0.441615  | 5.297068  | 1.697326  |
| Ga | -4.097657 | 3.526236  | -2.565632 |

Ga 5.076514 1.783599 -1.144556

XYZ of Ga<sub>13</sub>

193

|    |           |           |           |
|----|-----------|-----------|-----------|
| Ga | -0.348120 | -0.085005 | -0.227292 |
| Ga | 2.724445  | -0.529519 | 0.159038  |
| Ga | -3.421686 | 0.359509  | -0.613637 |
| Ga | -1.493515 | 2.819320  | -0.425870 |
| Ga | 0.796259  | -2.989332 | -0.027729 |
| Ga | -2.245235 | -2.542344 | -0.617608 |
| Ga | 1.548994  | 2.371335  | 0.163022  |
| O  | 4.153440  | 0.063245  | -0.961184 |
| O  | -4.849681 | -0.233255 | 0.506601  |
| O  | -2.405547 | 3.631601  | -1.894911 |
| O  | 1.708307  | -3.801611 | 1.440313  |
| O  | -2.169727 | -3.890218 | -1.969741 |
| O  | 1.473486  | 3.718208  | 1.515153  |
| O  | 3.084146  | 2.899826  | -0.833734 |
| O  | -3.780387 | -3.070836 | 0.379148  |
| O  | -4.356346 | 1.308540  | -1.975691 |
| O  | 3.659090  | -1.478553 | 1.522092  |
| O  | 0.741450  | -4.414422 | -1.292994 |
| O  | -1.438706 | 4.243410  | 0.839393  |
| O  | 6.854386  | 1.225226  | -1.673872 |
| O  | -7.551612 | -1.395234 | 1.218274  |
| O  | 3.795216  | -5.466647 | 2.865088  |
| O  | 1.588267  | 6.496475  | 2.708439  |
| O  | 5.724534  | 3.960408  | -1.376549 |
| O  | -6.421790 | -4.131420 | 0.922949  |
| O  | 5.669874  | -3.161157 | 2.755657  |
| O  | -1.229394 | 6.945073  | 1.865908  |
| O  | 1.360960  | 0.538883  | -0.953174 |
| O  | -2.056200 | -0.710893 | 0.498602  |
| O  | -1.508997 | 0.992512  | -1.378434 |
| O  | 0.813756  | -1.163522 | 0.923863  |
| O  | -0.457406 | -1.745637 | -1.260895 |
| O  | -0.238819 | 1.575629  | 0.805312  |
| O  | 2.608663  | 1.117232  | 1.129210  |
| O  | -3.304903 | -1.288241 | -1.583795 |
| O  | -3.071374 | 2.000476  | 0.287539  |
| O  | 2.374149  | -2.171484 | -0.743139 |
| O  | -0.976216 | -3.412825 | 0.523641  |
| O  | 0.280975  | 3.241815  | -0.978212 |
| O  | 5.712461  | 2.009310  | 0.829018  |
| O  | -6.408717 | -2.179322 | -1.282602 |
| O  | 4.514438  | -4.361699 | 0.328186  |
| O  | 0.900931  | 6.289779  | -0.059720 |
| O  | 4.624542  | 2.005702  | -3.297868 |
| O  | -5.320783 | -2.176712 | 2.843282  |

|   |           |           |           |
|---|-----------|-----------|-----------|
| O | -3.737694 | 2.814550  | -4.544186 |
| O | 3.040469  | -2.985557 | 4.088585  |
| O | -0.233853 | -4.909994 | -4.130169 |
| O | -0.463373 | 4.739987  | 3.674570  |
| O | -4.688696 | -5.291295 | -4.238208 |
| O | 7.053888  | -1.645038 | -2.418582 |
| O | -1.962309 | 6.821718  | -3.651065 |
| O | 4.752256  | 0.290176  | 3.432877  |
| O | -5.448497 | -0.460186 | -3.887460 |
| O | -3.902412 | 4.503982  | 2.193018  |
| O | 3.206171  | -4.674992 | -2.647603 |
| O | -3.168000 | -5.173881 | 2.161728  |
| O | 2.471759  | 5.002871  | -2.616313 |
| O | 3.992441  | 5.120283  | 3.784623  |
| N | -5.385203 | -4.529966 | -3.550868 |
| N | 6.569442  | -2.550704 | -1.723895 |
| N | -1.125910 | 6.932725  | -2.743097 |
| N | 4.054765  | 1.050508  | 4.119200  |
| N | -4.751990 | -1.221515 | -4.574800 |
| N | -4.386842 | 3.598319  | 2.886705  |
| N | 3.689617  | -3.768326 | -3.342303 |
| N | -2.330600 | -5.062873 | 3.069712  |
| N | 1.635360  | 4.891864  | -3.524282 |
| N | 4.687947  | 4.358954  | 3.097267  |
| O | -6.589652 | -4.342547 | -3.796618 |
| O | 7.028819  | -3.705616 | -1.738641 |
| O | -0.351871 | 7.901676  | -2.679184 |
| O | 2.851300  | 1.238925  | 3.874467  |
| O | -3.548526 | -1.408932 | -4.330066 |
| O | -3.927481 | 2.443404  | 2.872959  |
| O | 3.231240  | -2.614414 | -3.327544 |
| O | -1.557562 | -4.092923 | 3.133611  |
| O | 0.860321  | 3.921913  | -3.588212 |
| O | 5.892412  | 4.172537  | 3.342020  |
| O | -7.302174 | -1.483709 | 5.769358  |
| O | 2.693297  | -4.719847 | 7.225711  |
| O | 8.295770  | -0.233874 | 0.177698  |
| O | -2.660514 | 5.915148  | 4.788298  |
| O | -4.874596 | -3.929106 | -2.595673 |
| O | 5.596352  | -2.309501 | -0.996921 |
| O | -1.045925 | 6.052726  | -1.873823 |
| O | 4.565372  | 1.651367  | 5.074395  |
| O | -5.262613 | -1.822377 | -5.528996 |
| O | -5.359932 | 3.839521  | 3.613679  |
| O | 4.663691  | -4.010531 | -4.068265 |
| O | -2.251601 | -5.941870 | 3.937973  |
| O | 1.555360  | 5.771861  | -4.392556 |
| O | 4.178340  | 3.758094  | 2.142087  |
| O | -7.887359 | -0.427647 | 3.979770  |

|   |           |           |           |
|---|-----------|-----------|-----------|
| O | 2.482018  | -5.943796 | 5.458493  |
| O | 6.742334  | -0.474478 | 1.655900  |
| O | -4.214980 | 5.674539  | 6.268484  |
| O | 7.190119  | 0.256637  | -4.434370 |
| N | -7.984212 | -1.444336 | 4.705046  |
| N | 3.225877  | -5.439722 | 6.332972  |
| N | 7.722734  | -0.956943 | 1.042491  |
| N | -3.233565 | 5.192077  | 5.654091  |
| N | 7.287986  | 1.274329  | -5.160629 |
| O | -8.700222 | -2.375663 | 4.374064  |
| O | 4.432502  | -5.626501 | 6.301723  |
| O | 8.118060  | -2.082482 | 1.295879  |
| O | -2.837240 | 4.065538  | 5.907492  |
| O | 8.004981  | 2.204653  | -4.828634 |
| H | 2.617569  | 1.101533  | 1.865393  |
| H | -3.313825 | -1.271545 | -2.318977 |
| H | -3.233131 | 2.094813  | 0.999402  |
| H | 2.535890  | -2.265823 | -1.454002 |
| H | -1.147886 | -3.522479 | 1.230883  |
| H | 0.451645  | 3.352469  | -1.685466 |
| H | 4.518475  | -0.478567 | -1.023941 |
| H | -5.215716 | 0.308557  | 0.569342  |
| H | -2.099719 | 4.208769  | -1.950975 |
| H | 1.402478  | -4.379779 | 1.496374  |
| H | -2.792713 | -3.920822 | -2.174225 |
| H | 2.096472  | 3.750813  | 1.719642  |
| H | 1.441653  | 0.583377  | -1.595930 |
| H | -2.137894 | -0.753387 | 1.141347  |
| H | -1.435264 | 0.973010  | -2.023443 |
| H | 0.739039  | -1.143018 | 1.567859  |
| H | -0.324819 | -1.741155 | -1.895960 |
| H | -0.372406 | 1.570147  | 1.440360  |
| H | 2.930425  | 3.462781  | -1.254799 |
| H | -3.627681 | -3.632793 | 0.801201  |
| H | -4.665410 | 0.850562  | -2.435460 |
| H | 3.970154  | -1.020574 | 1.981892  |
| H | 1.384227  | -4.501624 | -1.604543 |
| H | -2.080467 | 4.329614  | 1.149955  |
| O | -4.491441 | 5.295639  | -3.320673 |
| O | -5.209694 | 4.190687  | -0.781756 |
| O | -6.367130 | 2.990144  | -3.209257 |
| O | -2.283493 | -6.667482 | -3.164010 |
| O | -1.597172 | -6.460789 | -0.394866 |
| O | 0.533138  | -7.116085 | -2.319494 |
| O | 6.605933  | 1.313699  | -6.223942 |
| H | -4.065302 | 2.016481  | -4.966016 |
| H | -3.138553 | 3.395716  | -5.016867 |
| H | -6.731572 | 2.103177  | -3.243803 |
| H | -6.905287 | 3.740688  | -3.472666 |

|    |           |           |           |
|----|-----------|-----------|-----------|
| H  | -5.205525 | 5.526933  | -3.918971 |
| H  | -3.842215 | 5.957141  | -3.069330 |
| H  | -5.916794 | 3.742517  | -0.313395 |
| H  | -4.886493 | 5.039000  | -0.465888 |
| H  | -2.091749 | -7.278637 | -0.488220 |
| H  | -1.444335 | -6.088783 | 0.477399  |
| H  | 0.192613  | -8.007910 | -2.414697 |
| H  | 1.481011  | -6.962002 | -2.304849 |
| H  | -2.484245 | -7.550246 | -2.845038 |
| H  | -2.731892 | -6.323747 | -3.939064 |
| H  | -0.480601 | -5.462306 | -4.875250 |
| H  | 0.279297  | -4.111598 | -4.273607 |
| H  | -5.674643 | -2.898965 | 3.366341  |
| H  | -4.840241 | -1.464639 | 3.271220  |
| H  | -8.308769 | -1.985348 | 1.226499  |
| H  | -7.663985 | -0.467747 | 1.435748  |
| H  | -7.114886 | -4.428135 | 0.328747  |
| H  | -6.094036 | -4.716964 | 1.608616  |
| H  | -6.943298 | -2.921714 | -1.575408 |
| H  | -6.234737 | -1.449916 | -1.881364 |
| H  | 2.036651  | 6.153738  | 3.484496  |
| H  | 1.789034  | 7.380240  | 2.388470  |
| H  | -2.176252 | 6.790992  | 1.850278  |
| H  | -0.890854 | 7.837900  | 1.960084  |
| H  | -0.976538 | 3.941588  | 3.819008  |
| H  | -0.216625 | 5.292299  | 4.419652  |
| H  | 0.748079  | 5.917771  | -0.930985 |
| H  | 1.395508  | 7.107627  | 0.033635  |
| H  | 5.536496  | 1.278906  | 1.426748  |
| H  | 6.246043  | 2.750702  | 1.121807  |
| H  | 5.394765  | 4.546949  | -2.061245 |
| H  | 6.418660  | 4.257127  | -0.784333 |
| H  | 6.967744  | 0.296737  | -1.890334 |
| H  | 7.612529  | 1.815338  | -1.681083 |
| H  | 4.144016  | 1.293631  | -3.726805 |
| H  | 4.978402  | 2.727955  | -3.820927 |
| H  | 6.208031  | -3.910700 | 3.019067  |
| H  | 6.034316  | -2.273189 | 2.790205  |
| H  | 4.192237  | -5.208012 | 0.012337  |
| H  | 5.221523  | -3.911532 | -0.139171 |
| H  | 3.145974  | -6.128151 | 2.614745  |
| H  | 4.510299  | -5.697940 | 3.463401  |
| H  | 2.441327  | -3.566724 | 4.561267  |
| H  | 3.369062  | -2.187491 | 4.511430  |
| Ga | -0.828836 | -5.459658 | -2.142175 |
| Ga | 3.648744  | -3.467864 | 2.087407  |
| Ga | 0.132596  | 5.288648  | 1.687590  |
| Ga | -4.344970 | 3.296857  | -2.542992 |
| Ga | 4.907509  | 1.981826  | -1.170411 |

Ga -5.602750 -2.152836 0.715840
